# Supplementary material for: In situ determination of antimony isotope ratios in Sb minerals by femtosecond LA-MC-ICP-MS
Source: Royal Society of Chemistry journal article supplement (doi:10.1039/d1ja00089f), 2021-01-01
Supplement: d1ja00089f1.pdf [file d1ja00089f1.pdf]

1            ***In-situ* determination of antimony isotope ratios in Sb-rich**  
2            **minerals by femtosecond LA-MC-ICP-MS**

3  
4            A.B. KAUFMANN<sup>1</sup>, M. LAZAROV<sup>1</sup>, S. KIEFER<sup>2</sup>, J. MAJZLAN<sup>2</sup>, S. WEYER<sup>1</sup>

5  
6  
7            <sup>1</sup>Institute of Mineralogy, Leibniz University Hannover, Germany

8  
9            <sup>2</sup>Institute of Geosciences, Friedrich Schiller University Jena, Germany

10  
11  
12          Appendix A. Supplementary information

13  
14  
15  
16  
17  
18  
19  
20  
21  
22  
23  
24  
25  
26  
27  
28

29 **Spike calibration**

30 In this study, both the ratio of  $^{119}\text{Sn}/^{117}\text{Sn}$ , which is interference free, as well as  $^{120}\text{Sn}/^{118}\text{Sn}$  were used  
 31 for mass bias correction ratios (in order to check internal consistency of the method). As the Sb  
 32 content of the samples may be purely known, different Sb/Sn ratios were tested for consistency.  
 33 Figures S1a and S1b illustrates the relationship between  $\beta_{119/117}$  and  $\beta_{120/118}$  for a range of  $\beta$  values  
 34 (variable mass bias) and different Sb/Sn ratios on the Sb isotope composition. No mass bias drift in  
 35 figure S1a at Sb/Sn ratios between 0.3 and 4 could be recognized. This implies, that using both  $\beta_{119/117}$   
 36 and  $\beta_{120/118}$  for instrumental mass bias correction during laser ablation Sb isotope measurements  
 37 with constant Sn and variable Sb contents between different materials provides reliable and robust  
 38 results.

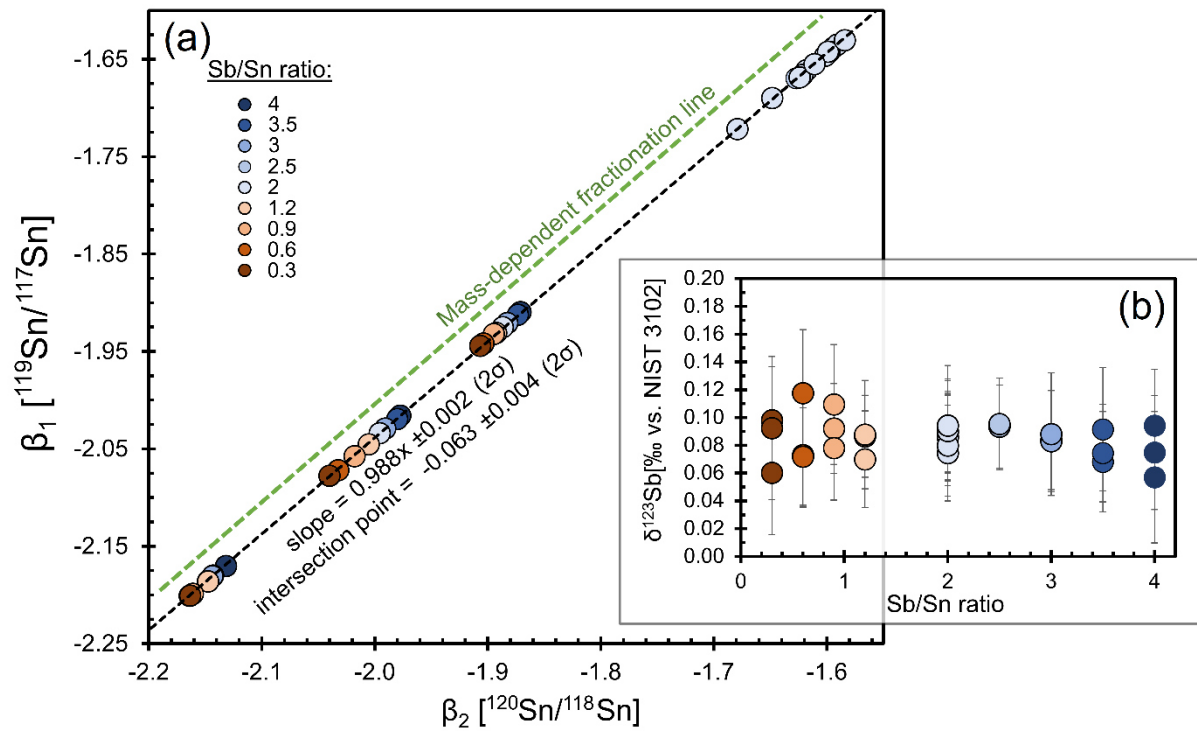

39  
 40 Fig. S1. Comparison between  $\beta_1$  versus  $\beta_2$  (a) and  $\delta^{123}\text{Sb}$  relative to NIST SRM 3102a versus Sb/Sn ratios  
 41 (b), respectively, obtained by mixing experiments with solution nebulisation MC-ICP-MS. Error bars  
 42 ( $2\sigma$ ) smaller than the symbol size are not shown in figure (a). The theoretical mass dependent  
 43 fractionation line is coloured in green. The result of the classical x-y regression method after Ludwig  
 44 (2003)<sup>1</sup> is shown in figure (a). Error bars of  $\delta$  values represent  $2\sigma$  (error-propagated internal  
 45 uncertainties ( $2\text{ SE}$ ) of the sample and standard measurements).

46

47

48

49 **Antimony oxide (senarmontite)**

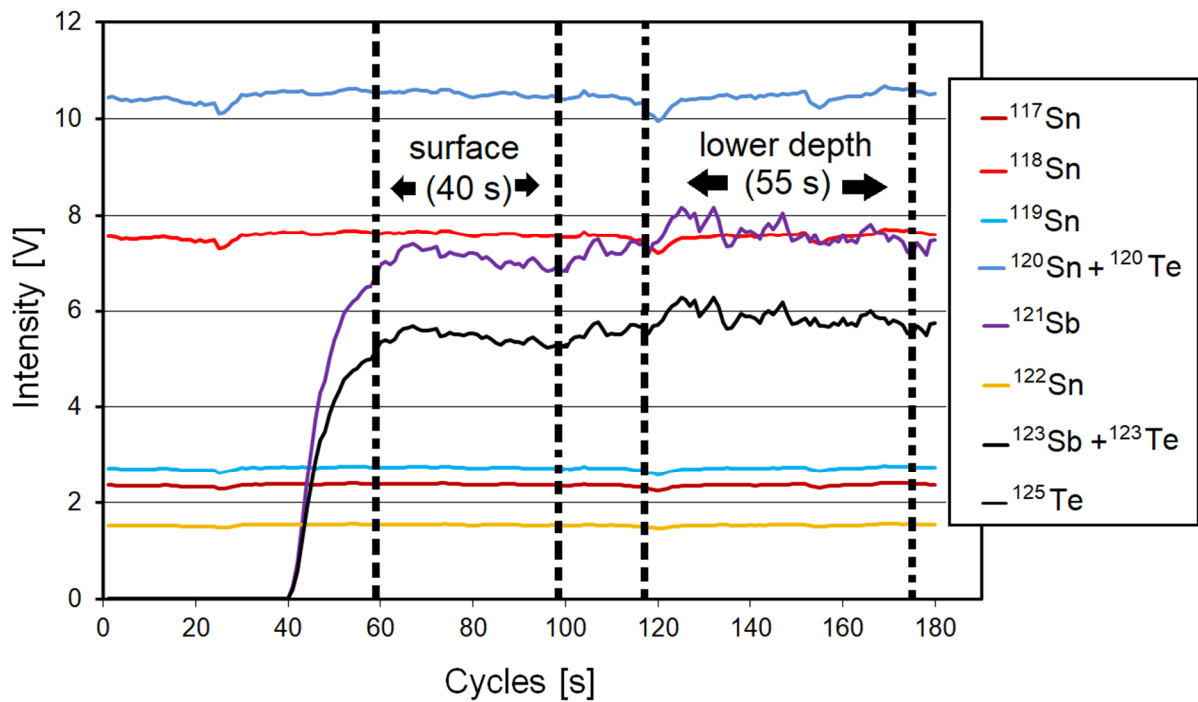

50

51 Fig. S2. Laser ablation time resolved intensities for line analyses of one senarmontite grain. Note that  
52 the signal intensities of senarmontite is marked by a strong increase of the intensity and changes of  
53 the  $\delta^{123}\text{Sb}$  value after the first 40 s of analysis. Details will be discussed in the text.

54

55

56

57

58

59

60 **References**

61 (1) K. R. Ludwig, User's manual for isoplot 3.00, a geochronological toolkit for microsoft excel. *Berkeley*  
62 *Geochronl. Cent. Spec. Publ.*, 2003, 4, 25–32.

63

Table S1

|                                   | raw + blk corr              |            | MB-Te + blk                 |            | MB corr( <sup>119</sup> Sn/ <sup>117</sup> Sn) |            | MB corr( <sup>120</sup> Sn/ <sup>118</sup> Sn) |            |
|-----------------------------------|-----------------------------|------------|-----------------------------|------------|------------------------------------------------|------------|------------------------------------------------|------------|
|                                   | $\delta^{123}\text{Sb}$ [‰] | 2 $\sigma$ | $\delta^{123}\text{Sb}$ [‰] | 2 $\sigma$ | $\delta^{123}\text{Sb}$ [‰]                    | 2 $\sigma$ | $\delta^{123}\text{Sb}$ [‰]                    | 2 $\sigma$ |
| <b>slow cooled (SC) stibnite:</b> |                             |            |                             |            |                                                |            |                                                |            |
| SC1-untreated-1                   | -0.215                      | 0.015      | -0.215                      | 0.015      | -0.175                                         | 0.028      | -0.191                                         | 0.019      |
| SC1-untreated-2                   | -0.254                      | 0.016      | -0.254                      | 0.016      | -0.194                                         | 0.027      | -0.199                                         | 0.018      |
| SC1-untreated-3                   | -0.097                      | 0.038      | -0.097                      | 0.038      | -0.186                                         | 0.026      | -0.181                                         | 0.018      |
| SC2-untreated-1                   | -0.270                      | 0.016      | -0.270                      | 0.016      | -0.200                                         | 0.026      | -0.198                                         | 0.018      |
| SC2-untreated-2                   | -0.188                      | 0.016      | -0.188                      | 0.016      | -0.188                                         | 0.026      | -0.189                                         | 0.016      |
| SC2-untreated-3                   | -0.188                      | 0.017      | -0.188                      | 0.017      | -0.195                                         | 0.026      | -0.203                                         | 0.016      |
| SC2-purified-1                    | -0.094                      | 0.016      | -0.094                      | 0.016      | -0.184                                         | 0.028      | -0.185                                         | 0.018      |
| SC2-purified-2                    | -0.167                      | 0.021      | -0.167                      | 0.021      | -0.163                                         | 0.040      | -0.160                                         | 0.026      |
| SC3-untreated-1                   | -0.159                      | 0.017      | -0.159                      | 0.017      | -0.199                                         | 0.026      | -0.200                                         | 0.016      |
| SC3-untreated-2                   | -0.177                      | 0.015      | -0.177                      | 0.015      | -0.187                                         | 0.025      | -0.191                                         | 0.016      |
| SC3-untreated-3                   | -0.162                      | 0.015      | -0.162                      | 0.015      | -0.178                                         | 0.023      | -0.193                                         | 0.015      |
| SC3-purified-1                    | -0.144                      | 0.020      | -0.144                      | 0.020      | -0.178                                         | 0.034      | -0.204                                         | 0.021      |
| SC3-purified-2                    | -0.196                      | 0.020      | -0.196                      | 0.020      | -0.214                                         | 0.035      | -0.203                                         | 0.025      |
| SC3-purified-3                    | -0.282                      | 0.020      | -0.282                      | 0.020      | -0.223                                         | 0.041      | -0.203                                         | 0.027      |
| SC4-untreated-1                   | -0.192                      | 0.015      | -0.192                      | 0.015      | -0.178                                         | 0.024      | -0.178                                         | 0.019      |
| SC4-untreated-2                   | -0.176                      | 0.015      | -0.176                      | 0.015      | -0.207                                         | 0.025      | -0.185                                         | 0.016      |
| SC4-untreated-3                   | -0.187                      | 0.016      | -0.187                      | 0.016      | -0.163                                         | 0.024      | -0.192                                         | 0.016      |
| SC4-purified-1                    | -0.090                      | 0.015      | -0.090                      | 0.015      | -0.181                                         | 0.027      | -0.168                                         | 0.018      |
| SC4-purified-2                    | -0.117                      | 0.018      | -0.117                      | 0.018      | -0.184                                         | 0.039      | -0.179                                         | 0.025      |
| SC4-purified-3                    | -0.141                      | 0.021      | -0.141                      | 0.021      | -0.199                                         | 0.037      | -0.199                                         | 0.023      |
| <b>quenched (Q) stibnite:</b>     |                             |            |                             |            |                                                |            |                                                |            |
| Q1-untreated-1                    | -0.214                      | 0.021      | -0.214                      | 0.021      | -0.158                                         | 0.028      | -0.152                                         | 0.020      |
| Q1-untreated-2                    | -0.255                      | 0.028      | -0.255                      | 0.028      | -0.177                                         | 0.025      | -0.157                                         | 0.020      |
| Q1-untreated-3                    | -0.233                      | 0.023      | -0.233                      | 0.023      | -0.141                                         | 0.027      | -0.157                                         | 0.017      |
| Q2-untreated-1                    | -0.203                      | 0.013      | -0.203                      | 0.013      | -0.211                                         | 0.024      | -0.197                                         | 0.016      |
| Q2-untreated-2                    | -0.230                      | 0.015      | -0.230                      | 0.015      | -0.205                                         | 0.024      | -0.208                                         | 0.016      |
| Q2-untreated-3                    | -0.252                      | 0.016      | -0.252                      | 0.016      | -0.209                                         | 0.025      | -0.209                                         | 0.016      |
| Q2-purified-1                     | -0.164                      | 0.015      | -0.164                      | 0.015      | -0.188                                         | 0.027      | -0.195                                         | 0.019      |
| Q2-purified-2                     | -0.226                      | 0.021      | -0.226                      | 0.021      | -0.181                                         | 0.036      | -0.182                                         | 0.026      |
| Q2-purified-3                     | -0.115                      | 0.019      | -0.115                      | 0.019      | -0.173                                         | 0.039      | -0.213                                         | 0.039      |
| Q3-untreated-1                    | -0.205                      | 0.014      | -0.205                      | 0.014      | -0.207                                         | 0.025      | -0.199                                         | 0.016      |
| Q3-untreated-2                    | -0.205                      | 0.015      | -0.205                      | 0.015      | -0.201                                         | 0.024      | -0.209                                         | 0.019      |
| Q3-untreated-3                    | -0.226                      | 0.016      | -0.226                      | 0.016      | -0.206                                         | 0.025      | -0.205                                         | 0.015      |
| Q4-untreated-1                    | -0.226                      | 0.015      | -0.226                      | 0.015      | -0.206                                         | 0.025      | -0.211                                         | 0.018      |
| Q4-untreated-2                    | -0.232                      | 0.016      | -0.232                      | 0.016      | -0.190                                         | 0.025      | -0.206                                         | 0.019      |
| Q4-untreated-3                    | -0.228                      | 0.017      | -0.228                      | 0.017      | -0.203                                         | 0.025      | -0.202                                         | 0.017      |
| Q4-purified-1                     | -0.183                      | 0.016      | -0.183                      | 0.016      | -0.197                                         | 0.029      | -0.200                                         | 0.020      |
| Q4-purified-2                     | -0.178                      | 0.021      | -0.178                      | 0.021      | -0.193                                         | 0.038      | -0.193                                         | 0.027      |
| Q4-purified-3                     | -0.145                      | 0.021      | -0.145                      | 0.021      | -0.191                                         | 0.039      | -0.215                                         | 0.039      |
| <b>MET:</b>                       |                             |            |                             |            |                                                |            |                                                |            |
| MET1-untreated-1                  | 0.255                       | 0.015      | 0.255                       | 0.015      | 0.219                                          | 0.027      | 0.218                                          | 0.019      |
| MET1-untreated-2                  | 0.204                       | 0.015      | 0.204                       | 0.015      | 0.218                                          | 0.026      | 0.211                                          | 0.016      |
| MET1-untreated-3                  | 0.225                       | 0.015      | 0.225                       | 0.015      | 0.206                                          | 0.024      | 0.202                                          | 0.018      |
| MET1-purified-1                   | 0.180                       | 0.016      | 0.180                       | 0.016      | 0.195                                          | 0.031      | 0.181                                          | 0.021      |
| MET1-purified-2                   | 0.255                       | 0.018      | 0.255                       | 0.018      | 0.185                                          | 0.038      | 0.203                                          | 0.025      |
| MET1-purified-3                   | 0.230                       | 0.019      | 0.230                       | 0.019      | 0.183                                          | 0.039      | 0.187                                          | 0.028      |
| MET2-untreated-1                  | 0.202                       | 0.016      | 0.202                       | 0.016      | 0.231                                          | 0.027      | 0.214                                          | 0.018      |
| MET2-untreated-2                  | 0.205                       | 0.014      | 0.206                       | 0.014      | 0.209                                          | 0.026      | 0.208                                          | 0.017      |
| MET2-untreated-3                  | 0.205                       | 0.016      | 0.205                       | 0.016      | 0.219                                          | 0.025      | 0.225                                          | 0.018      |
| MET2-purified-2                   | 0.335                       | 0.018      | 0.334                       | 0.018      | 0.201                                          | 0.038      | 0.207                                          | 0.025      |
| MET2-purified-3                   | 0.252                       | 0.019      | 0.252                       | 0.019      | 0.211                                          | 0.039      | 0.196                                          | 0.027      |
| MET3-untreated-1                  | 0.219                       | 0.016      | 0.220                       | 0.016      | 0.196                                          | 0.027      | 0.202                                          | 0.018      |
| MET3-untreated-2                  | 0.230                       | 0.014      | 0.230                       | 0.014      | 0.200                                          | 0.023      | 0.214                                          | 0.016      |
| MET3-untreated-3                  | 0.203                       | 0.015      | 0.203                       | 0.015      | 0.169                                          | 0.025      | 0.161                                          | 0.020      |
| MET4-untreated-1                  | 0.126                       | 0.025      | 0.127                       | 0.025      | 0.138                                          | 0.030      | 0.149                                          | 0.027      |
| MET4-untreated-2                  | 0.178                       | 0.024      | 0.178                       | 0.024      | 0.156                                          | 0.030      | 0.153                                          | 0.024      |
| MET4-untreated-3                  | 0.145                       | 0.025      | 0.147                       | 0.025      | 0.128                                          | 0.031      | 0.121                                          | 0.027      |

**Table S1**

|                   | raw + blk corr              |            | MB-Te + blk                 |            | MB corr( <sup>119</sup> Sn/ <sup>117</sup> Sn) |            | MB corr( <sup>120</sup> Sn/ <sup>118</sup> Sn) |            |
|-------------------|-----------------------------|------------|-----------------------------|------------|------------------------------------------------|------------|------------------------------------------------|------------|
|                   | $\delta^{123}\text{Sb}$ [‰] | 2 $\sigma$ | $\delta^{123}\text{Sb}$ [‰] | 2 $\sigma$ | $\delta^{123}\text{Sb}$ [‰]                    | 2 $\sigma$ | $\delta^{123}\text{Sb}$ [‰]                    | 2 $\sigma$ |
| <b>MAC:</b>       |                             |            |                             |            |                                                |            |                                                |            |
| MAC11-untreated-1 | 0.625                       | 0.015      | 0.625                       | 0.015      | 0.634                                          | 0.027      | 0.634                                          | 0.017      |
| MAC11-untreated-2 | 0.635                       | 0.018      | 0.635                       | 0.018      | 0.641                                          | 0.026      | 0.641                                          | 0.017      |
| MAC11-untreated-3 | 0.631                       | 0.018      | 0.632                       | 0.018      | 0.635                                          | 0.027      | 0.616                                          | 0.017      |
| MAC11-purified-1  | 0.637                       | 0.014      | 0.637                       | 0.014      | 0.639                                          | 0.029      | 0.632                                          | 0.019      |
| MAC11-purified-2  | 0.634                       | 0.020      | 0.634                       | 0.020      | 0.665                                          | 0.037      | 0.655                                          | 0.027      |
| MAC11-purified-3  | 0.753                       | 0.022      | 0.753                       | 0.022      | 0.672                                          | 0.040      | 0.636                                          | 0.042      |
| MAC12-untreated-1 | 0.651                       | 0.016      | 0.651                       | 0.016      | 0.655                                          | 0.027      | 0.638                                          | 0.014      |
| MAC12-untreated-2 | 0.654                       | 0.017      | 0.654                       | 0.017      | 0.650                                          | 0.028      | 0.650                                          | 0.020      |
| MAC12-untreated-3 | 0.658                       | 0.017      | 0.658                       | 0.017      | 0.652                                          | 0.024      | 0.651                                          | 0.017      |
| MAC21-untreated-1 | 0.657                       | 0.017      | 0.657                       | 0.017      | 0.642                                          | 0.026      | 0.633                                          | 0.016      |
| MAC21-untreated-2 | 0.666                       | 0.017      | 0.666                       | 0.017      | 0.614                                          | 0.027      | 0.631                                          | 0.019      |
| MAC21-untreated-3 | 0.657                       | 0.017      | 0.657                       | 0.017      | 0.635                                          | 0.023      | 0.635                                          | 0.018      |
| MAC21-purified-1  | 0.694                       | 0.016      | 0.694                       | 0.016      | 0.639                                          | 0.031      | 0.630                                          | 0.019      |
| MAC21-purified-2  | 0.681                       | 0.021      | 0.681                       | 0.021      | 0.666                                          | 0.038      | 0.655                                          | 0.027      |
| MAC21-purified-3  | 0.716                       | 0.021      | 0.716                       | 0.021      | 0.658                                          | 0.042      | 0.638                                          | 0.041      |
| MAC22-untreated-1 | 0.660                       | 0.017      | 0.660                       | 0.017      | 0.635                                          | 0.026      | 0.644                                          | 0.018      |
| MAC22-untreated-2 | 0.661                       | 0.017      | 0.661                       | 0.017      | 0.637                                          | 0.025      | 0.643                                          | 0.018      |
| MAC22-untreated-3 | 0.634                       | 0.017      | 0.634                       | 0.017      | 0.647                                          | 0.025      | 0.669                                          | 0.018      |

Table S2

|                    | relative to SC (for MAC and MET) and relative to MAC (for SC) |            |                             |            |                                                |            |                                                |            | relative to NIST            |            |                             |            |                                                |            |                                                |            |
|--------------------|---------------------------------------------------------------|------------|-----------------------------|------------|------------------------------------------------|------------|------------------------------------------------|------------|-----------------------------|------------|-----------------------------|------------|------------------------------------------------|------------|------------------------------------------------|------------|
|                    | raw + blk corr                                                |            | MB-Te + blk                 |            | MB corr( <sup>119</sup> Sn/ <sup>117</sup> Sn) |            | MB corr( <sup>120</sup> Sn/ <sup>118</sup> Sn) |            | raw + blk corr              |            | MB-Te + blk                 |            | MB corr( <sup>119</sup> Sn/ <sup>117</sup> Sn) |            | MB corr( <sup>120</sup> Sn/ <sup>118</sup> Sn) |            |
|                    | $\delta^{123}\text{Sb}$ [‰]                                   | 2 $\sigma$ | $\delta^{123}\text{Sb}$ [‰] | 2 $\sigma$ | $\delta^{123}\text{Sb}$ [‰]                    | 2 $\sigma$ | $\delta^{123}\text{Sb}$ [‰]                    | 2 $\sigma$ | $\delta^{123}\text{Sb}$ [‰] | 2 $\sigma$ | $\delta^{123}\text{Sb}$ [‰] | 2 $\sigma$ | $\delta^{123}\text{Sb}$ [‰]                    | 2 $\sigma$ | $\delta^{123}\text{Sb}$ [‰]                    | 2 $\sigma$ |
| SC_LA MC-ICP-MS_01 | -0.895                                                        | 0.019      | -0.895                      | 0.020      | -0.880                                         | 0.028      | -0.875                                         | 0.036      |                             |            |                             |            | -0.235                                         | 0.028      | -0.234                                         | 0.036      |
| SC_LA MC-ICP-MS_02 | -0.846                                                        | 0.021      | -0.846                      | 0.021      | -0.874                                         | 0.029      | -0.869                                         | 0.036      |                             |            |                             |            | -0.229                                         | 0.029      | -0.228                                         | 0.036      |
| SC_LA MC-ICP-MS_03 | -0.785                                                        | 0.017      | -0.785                      | 0.017      | -0.821                                         | 0.029      | -0.829                                         | 0.037      |                             |            |                             |            | -0.176                                         | 0.029      | -0.188                                         | 0.037      |
| SC_LA MC-ICP-MS_04 | -0.898                                                        | 0.016      | -0.898                      | 0.016      | -0.838                                         | 0.028      | -0.841                                         | 0.036      |                             |            |                             |            | -0.193                                         | 0.028      | -0.200                                         | 0.036      |
| SC_LA MC-ICP-MS_05 | -0.913                                                        | 0.016      | -0.913                      | 0.016      | -0.842                                         | 0.028      | -0.836                                         | 0.036      |                             |            |                             |            | -0.197                                         | 0.028      | -0.195                                         | 0.036      |
| SC_LA MC-ICP-MS_06 | -1.042                                                        | 0.019      | -1.042                      | 0.019      | -0.901                                         | 0.029      | -0.893                                         | 0.040      |                             |            |                             |            | -0.256                                         | 0.029      | -0.252                                         | 0.040      |
| SC_LA MC-ICP-MS_07 | -0.824                                                        | 0.018      | -0.824                      | 0.018      | -0.905                                         | 0.027      | -0.924                                         | 0.043      |                             |            |                             |            | -0.260                                         | 0.027      | -0.283                                         | 0.043      |
| SC_LA MC-ICP-MS_08 | -0.931                                                        | 0.017      | -0.931                      | 0.017      | -0.804                                         | 0.027      | -0.805                                         | 0.044      |                             |            |                             |            | -0.159                                         | 0.027      | -0.164                                         | 0.044      |
| SC_LA MC-ICP-MS_09 | -0.794                                                        | 0.021      | -0.794                      | 0.021      | -0.890                                         | 0.030      | -0.878                                         | 0.044      |                             |            |                             |            | -0.245                                         | 0.030      | -0.237                                         | 0.044      |
| SC_LA MC-ICP-MS_10 | -0.925                                                        | 0.020      | -0.925                      | 0.020      | -0.914                                         | 0.029      | -0.909                                         | 0.040      |                             |            |                             |            | -0.269                                         | 0.029      | -0.268                                         | 0.040      |
| SC_LA MC-ICP-MS_11 | -0.862                                                        | 0.021      | -0.862                      | 0.021      | -0.900                                         | 0.030      | -0.898                                         | 0.044      |                             |            |                             |            | -0.255                                         | 0.030      | -0.257                                         | 0.044      |
| SC_LA MC-ICP-MS_12 | -0.780                                                        | 0.017      | -0.779                      | 0.017      | -0.836                                         | 0.027      | -0.844                                         | 0.036      |                             |            |                             |            | -0.191                                         | 0.027      | -0.203                                         | 0.036      |
| SC_LA MC-ICP-MS_13 | -0.888                                                        | 0.025      | -0.888                      | 0.025      | -0.872                                         | 0.042      | -0.879                                         | 0.032      |                             |            |                             |            | -0.227                                         | 0.042      | -0.238                                         | 0.032      |
| SC_LA MC-ICP-MS_14 | -0.999                                                        | 0.028      | -0.999                      | 0.028      | -0.860                                         | 0.044      | -0.846                                         | 0.034      |                             |            |                             |            | -0.215                                         | 0.044      | -0.205                                         | 0.034      |
| SC_LA MC-ICP-MS_15 | -1.004                                                        | 0.027      | -1.004                      | 0.027      | -0.909                                         | 0.042      | -0.901                                         | 0.033      |                             |            |                             |            | -0.264                                         | 0.042      | -0.260                                         | 0.033      |
| SC_LA MC-ICP-MS_16 | -0.726                                                        | 0.027      | -0.726                      | 0.027      | -0.871                                         | 0.044      | -0.859                                         | 0.033      |                             |            |                             |            | -0.226                                         | 0.044      | -0.218                                         | 0.033      |
| SC_LA MC-ICP-MS_17 | -0.842                                                        | 0.025      | -0.842                      | 0.025      | -0.818                                         | 0.044      | -0.800                                         | 0.033      |                             |            |                             |            | -0.173                                         | 0.044      | -0.159                                         | 0.033      |
| SC_LA MC-ICP-MS_18 | -0.805                                                        | 0.025      | -0.806                      | 0.025      | -0.819                                         | 0.044      | -0.817                                         | 0.033      |                             |            |                             |            | -0.174                                         | 0.044      | -0.176                                         | 0.033      |
| SC_LA MC-ICP-MS_19 | -1.015                                                        | 0.025      | -1.016                      | 0.024      | -0.881                                         | 0.036      | -0.878                                         | 0.030      |                             |            |                             |            | -0.236                                         | 0.036      | -0.237                                         | 0.030      |
| SC_LA MC-ICP-MS_20 | -0.759                                                        | 0.023      | -0.758                      | 0.023      | -0.806                                         | 0.037      | -0.826                                         | 0.029      |                             |            |                             |            | -0.161                                         | 0.037      | -0.185                                         | 0.029      |
| SC_LA MC-ICP-MS_21 | -0.954                                                        | 0.061      | -0.937                      | 0.025      | -0.831                                         | 0.037      | -0.844                                         | 0.031      |                             |            |                             |            | -0.186                                         | 0.037      | -0.203                                         | 0.031      |
| SC_LA MC-ICP-MS_22 | -0.720                                                        | 0.061      | -0.705                      | 0.025      | -0.818                                         | 0.037      | -0.814                                         | 0.031      |                             |            |                             |            | -0.173                                         | 0.037      | -0.173                                         | 0.031      |
| SC_LA MC-ICP-MS_23 | -0.708                                                        | 0.061      | -0.694                      | 0.025      | -0.830                                         | 0.038      | -0.836                                         | 0.031      |                             |            |                             |            | -0.185                                         | 0.038      | -0.195                                         | 0.031      |
| SC_LA MC-ICP-MS_24 | -0.730                                                        | 0.083      | -0.706                      | 0.028      | -0.848                                         | 0.039      | -0.855                                         | 0.032      |                             |            |                             |            | -0.203                                         | 0.039      | -0.214                                         | 0.032      |
| SC_LA MC-ICP-MS_25 | -0.882                                                        | 0.082      | -0.851                      | 0.022      | -0.844                                         | 0.035      | -0.852                                         | 0.027      |                             |            |                             |            | -0.199                                         | 0.035      | -0.211                                         | 0.027      |
| SC_LA MC-ICP-MS_26 | -0.837                                                        | 0.025      | -0.837                      | 0.025      | -0.802                                         | 0.036      | -0.801                                         | 0.024      |                             |            |                             |            | -0.157                                         | 0.036      | -0.160                                         | 0.024      |
| SC_LA MC-ICP-MS_27 | -0.788                                                        | 0.025      | -0.789                      | 0.025      | -0.824                                         | 0.034      | -0.811                                         | 0.026      |                             |            |                             |            | -0.179                                         | 0.034      | -0.170                                         | 0.026      |
| SC_LA MC-ICP-MS_28 | -0.905                                                        | 0.027      | -0.906                      | 0.027      | -0.830                                         | 0.035      | -0.827                                         | 0.026      |                             |            |                             |            | -0.185                                         | 0.035      | -0.186                                         | 0.026      |
| SC_LA MC-ICP-MS_29 | -0.781                                                        | 0.028      | -0.780                      | 0.028      | -0.830                                         | 0.035      | -0.813                                         | 0.027      |                             |            |                             |            | -0.185                                         | 0.035      | -0.172                                         | 0.027      |
| SC_LA MC-ICP-MS_30 | -0.877                                                        | 0.031      | -0.876                      | 0.030      | -0.810                                         | 0.035      | -0.806                                         | 0.030      |                             |            |                             |            | -0.165                                         | 0.035      | -0.165                                         | 0.030      |
| SC_LA MC-ICP-MS_31 | -0.834                                                        | 0.029      | -0.834                      | 0.029      | -0.789                                         | 0.035      | -0.793                                         | 0.028      |                             |            |                             |            | -0.144                                         | 0.035      | -0.152                                         | 0.028      |
| SC_LA MC-ICP-MS_32 | -0.777                                                        | 0.028      | -0.777                      | 0.028      | -0.815                                         | 0.035      | -0.815                                         | 0.026      |                             |            |                             |            | -0.170                                         | 0.035      | -0.174                                         | 0.026      |
| SC_LA MC-ICP-MS_33 | -0.780                                                        | 0.025      | -0.780                      | 0.025      | -0.809                                         | 0.034      | -0.800                                         | 0.026      |                             |            |                             |            | -0.164                                         | 0.034      | -0.159                                         | 0.026      |
| SC_LA MC-ICP-MS_34 | -0.937                                                        | 0.024      | -0.935                      | 0.024      | -0.814                                         | 0.033      | -0.826                                         | 0.027      |                             |            |                             |            | -0.169                                         | 0.033      | -0.185                                         | 0.027      |
| SC_LA MC-ICP-MS_35 | -1.051                                                        | 0.022      | -1.050                      | 0.022      | -0.900                                         | 0.032      | -0.895                                         | 0.026      |                             |            |                             |            | -0.255                                         | 0.032      | -0.254                                         | 0.026      |
| SC_LA MC-ICP-MS_36 | -0.948                                                        | 0.023      | -0.942                      | 0.023      | -0.885                                         | 0.032      | -0.899                                         | 0.026      |                             |            |                             |            | -0.240                                         | 0.032      | -0.258                                         | 0.026      |
| SC_LA MC-ICP-MS_37 | -0.843                                                        | 0.021      | -0.841                      | 0.021      | -0.846                                         | 0.032      | -0.847                                         | 0.026      |                             |            |                             |            | -0.201                                         | 0.032      | -0.206                                         | 0.026      |
| SC_LA MC-ICP-MS_38 | -0.866                                                        | 0.025      | -0.865                      | 0.024      | -0.858                                         | 0.032      | -0.831                                         | 0.027      |                             |            |                             |            | -0.213                                         | 0.032      | -0.190                                         | 0.027      |
| SC_LA MC-ICP-MS_39 | -0.832                                                        | 0.029      | -0.838                      | 0.028      | -0.856                                         | 0.037      | -0.844                                         | 0.032      |                             |            |                             |            | -0.211                                         | 0.037      | -0.203                                         | 0.032      |
| SC_LA MC-ICP-MS_40 | -0.918                                                        | 0.029      | -0.919                      | 0.028      | -0.885                                         | 0.038      | -0.870                                         | 0.032      |                             |            |                             |            | -0.240                                         | 0.038      | -0.229                                         | 0.032      |
| SC_LA MC-ICP-MS_41 | -0.837                                                        | 0.029      | -0.840                      | 0.027      | -0.822                                         | 0.038      | -0.816                                         | 0.032      |                             |            |                             |            | -0.177                                         | 0.038      | -0.175                                         | 0.032      |
| SC_LA MC-ICP-MS_42 | -0.805                                                        | 0.030      | -0.806                      | 0.028      | -0.810                                         | 0.035      | -0.812                                         | 0.032      |                             |            |                             |            | -0.165                                         | 0.035      | -0.171                                         | 0.032      |
| SC_LA MC-ICP-MS_43 | -0.773                                                        | 0.029      | -0.775                      | 0.028      | -0.793                                         | 0.035      | -0.809                                         | 0.033      |                             |            |                             |            | -0.148                                         | 0.035      | -0.168                                         | 0.033      |
| SC_LA MC-ICP-MS_44 | -0.808                                                        | 0.026      | -0.810                      | 0.026      | -0.783                                         | 0.034      | -0.809                                         | 0.030      |                             |            |                             |            | -0.138                                         | 0.034      | -0.168                                         | 0.030      |
| SC_LA MC-ICP-MS_45 | -0.638                                                        | 0.027      | -0.639                      | 0.027      | -0.785                                         | 0.033      | -0.794                                         | 0.032      |                             |            |                             |            | -0.140                                         | 0.033      | -0.153                                         | 0.032      |
| SC_LA MC-ICP-MS_46 | -0.846                                                        | 0.027      | -0.848                      | 0.026      | -0.773                                         | 0.035      | -0.775                                         | 0.033      |                             |            |                             |            | -0.128                                         | 0.035      | -0.134                                         | 0.033      |

Table S2

|                     | relative to SC (for MAC and MET) and relative to MAC (for SC) |            |                             |            |                                                |            |                                                |            | relative to NIST            |            |                             |            |                                                |            |                                                |            |
|---------------------|---------------------------------------------------------------|------------|-----------------------------|------------|------------------------------------------------|------------|------------------------------------------------|------------|-----------------------------|------------|-----------------------------|------------|------------------------------------------------|------------|------------------------------------------------|------------|
|                     | raw + blk corr                                                |            | MB-Te + blk                 |            | MB corr( <sup>119</sup> Sn/ <sup>117</sup> Sn) |            | MB corr( <sup>120</sup> Sn/ <sup>118</sup> Sn) |            | raw + blk corr              |            | MB-Te + blk                 |            | MB corr( <sup>119</sup> Sn/ <sup>117</sup> Sn) |            | MB corr( <sup>120</sup> Sn/ <sup>118</sup> Sn) |            |
|                     | $\delta^{123}\text{Sb}$ [‰]                                   | 2 $\sigma$ | $\delta^{123}\text{Sb}$ [‰] | 2 $\sigma$ | $\delta^{123}\text{Sb}$ [‰]                    | 2 $\sigma$ | $\delta^{123}\text{Sb}$ [‰]                    | 2 $\sigma$ | $\delta^{123}\text{Sb}$ [‰] | 2 $\sigma$ | $\delta^{123}\text{Sb}$ [‰] | 2 $\sigma$ | $\delta^{123}\text{Sb}$ [‰]                    | 2 $\sigma$ | $\delta^{123}\text{Sb}$ [‰]                    | 2 $\sigma$ |
| SC_LA MC-ICP-MS_47  | -0.875                                                        | 0.028      | -0.878                      | 0.027      | -0.788                                         | 0.035      | -0.788                                         | 0.034      |                             |            |                             |            | -0.143                                         | 0.035      | -0.147                                         | 0.034      |
| SC_LA MC-ICP-MS_48  | -0.703                                                        | 0.028      | -0.708                      | 0.026      | -0.805                                         | 0.038      | -0.809                                         | 0.035      |                             |            |                             |            | -0.160                                         | 0.038      | -0.168                                         | 0.035      |
| SC_LA MC-ICP-MS_49  | -0.932                                                        | 0.028      | -0.937                      | 0.027      | -0.790                                         | 0.038      | -0.806                                         | 0.036      |                             |            |                             |            | -0.145                                         | 0.038      | -0.165                                         | 0.036      |
| SC_LA MC-ICP-MS_50  | -0.722                                                        | 0.031      | -0.722                      | 0.029      | -0.799                                         | 0.045      | -0.784                                         | 0.037      |                             |            |                             |            | -0.154                                         | 0.045      | -0.143                                         | 0.037      |
| SC_LA MC-ICP-MS_51  | -0.730                                                        | 0.031      | -0.741                      | 0.033      | -0.744                                         | 0.041      | -0.813                                         | 0.038      |                             |            |                             |            | -0.099                                         | 0.041      | -0.172                                         | 0.038      |
| SC_LA MC-ICP-MS_52  | -0.746                                                        | 0.038      | -0.750                      | 0.038      | -0.796                                         | 0.036      | -0.815                                         | 0.031      |                             |            |                             |            | -0.151                                         | 0.036      | -0.174                                         | 0.031      |
| SC_LA MC-ICP-MS_53  | -0.965                                                        | 0.042      | -0.970                      | 0.042      | -0.841                                         | 0.036      | -0.846                                         | 0.031      |                             |            |                             |            | -0.196                                         | 0.036      | -0.205                                         | 0.031      |
| SC_LA MC-ICP-MS_54  | -0.954                                                        | 0.030      | -0.952                      | 0.030      | -0.847                                         | 0.035      | -0.840                                         | 0.031      |                             |            |                             |            | -0.202                                         | 0.035      | -0.199                                         | 0.031      |
| SC_LA MC-ICP-MS_55  | -0.850                                                        | 0.030      | -0.849                      | 0.030      | -0.826                                         | 0.034      | -0.813                                         | 0.034      |                             |            |                             |            | -0.181                                         | 0.034      | -0.172                                         | 0.034      |
| SC_LA MC-ICP-MS_56  | -0.809                                                        | 0.033      | -0.813                      | 0.032      | -0.798                                         | 0.037      | -0.804                                         | 0.034      |                             |            |                             |            | -0.153                                         | 0.037      | -0.163                                         | 0.034      |
| SC_LA MC-ICP-MS_57  | -0.674                                                        | 0.030      | -0.678                      | 0.029      | -0.789                                         | 0.036      | -0.809                                         | 0.034      |                             |            |                             |            | -0.144                                         | 0.036      | -0.168                                         | 0.034      |
| SC_LA MC-ICP-MS_58  | -0.948                                                        | 0.034      | -0.948                      | 0.033      | -0.850                                         | 0.038      | -0.852                                         | 0.033      |                             |            |                             |            | -0.205                                         | 0.038      | -0.211                                         | 0.033      |
| SC_LA MC-ICP-MS_59  | -0.932                                                        | 0.033      | -0.933                      | 0.032      | -0.876                                         | 0.037      | -0.850                                         | 0.035      |                             |            |                             |            | -0.231                                         | 0.037      | -0.209                                         | 0.035      |
| SC_LA MC-ICP-MS_60  | -0.748                                                        | 0.033      | -0.751                      | 0.032      | -0.851                                         | 0.038      | -0.836                                         | 0.035      |                             |            |                             |            | -0.206                                         | 0.038      | -0.195                                         | 0.035      |
| SC_LA MC-ICP-MS_61  | -0.834                                                        | 0.031      | -0.834                      | 0.030      | -0.833                                         | 0.037      | -0.837                                         | 0.033      |                             |            |                             |            | -0.188                                         | 0.037      | -0.196                                         | 0.033      |
| SC_LA MC-ICP-MS_62  | -0.783                                                        | 0.029      | -0.783                      | 0.027      | -0.823                                         | 0.037      | -0.821                                         | 0.032      |                             |            |                             |            | -0.178                                         | 0.037      | -0.180                                         | 0.032      |
| SC_LA MC-ICP-MS_63  | -0.941                                                        | 0.028      | -0.947                      | 0.030      | -0.828                                         | 0.038      | -0.825                                         | 0.034      |                             |            |                             |            | -0.183                                         | 0.038      | -0.184                                         | 0.034      |
| SC_LA MC-ICP-MS_64  | -0.660                                                        | 0.030      | -0.658                      | 0.032      | -0.819                                         | 0.039      | -0.778                                         | 0.036      |                             |            |                             |            | -0.174                                         | 0.039      | -0.137                                         | 0.036      |
| SC_LA MC-ICP-MS_65  | -0.818                                                        | 0.028      | -0.822                      | 0.030      | -0.793                                         | 0.038      | -0.800                                         | 0.033      |                             |            |                             |            | -0.148                                         | 0.038      | -0.159                                         | 0.033      |
| SC_LA MC-ICP-MS_66  | -0.667                                                        | 0.028      | -0.668                      | 0.030      | -0.808                                         | 0.037      | -0.793                                         | 0.034      |                             |            |                             |            | -0.163                                         | 0.037      | -0.152                                         | 0.034      |
| SC_LA MC-ICP-MS_67  | -0.664                                                        | 0.030      | -0.669                      | 0.031      | -0.819                                         | 0.040      | -0.801                                         | 0.035      |                             |            |                             |            | -0.174                                         | 0.040      | -0.160                                         | 0.035      |
| SC_LA MC-ICP-MS_68  | -0.795                                                        | 0.029      | -0.798                      | 0.031      | -0.831                                         | 0.039      | -0.814                                         | 0.034      |                             |            |                             |            | -0.186                                         | 0.039      | -0.173                                         | 0.034      |
| SC_LA MC-ICP-MS_69  | -0.813                                                        | 0.030      | -0.818                      | 0.031      | -0.818                                         | 0.039      | -0.831                                         | 0.035      |                             |            |                             |            | -0.173                                         | 0.039      | -0.190                                         | 0.035      |
| SC_LA MC-ICP-MS_70  | -0.811                                                        | 0.028      | -0.808                      | 0.027      | -0.804                                         | 0.038      | -0.791                                         | 0.034      |                             |            |                             |            | -0.159                                         | 0.038      | -0.150                                         | 0.034      |
| SC_LA MC-ICP-MS_71  | -0.840                                                        | 0.029      | -0.835                      | 0.029      | -0.801                                         | 0.038      | -0.817                                         | 0.034      |                             |            |                             |            | -0.156                                         | 0.038      | -0.176                                         | 0.034      |
| SC_LA MC-ICP-MS_72  | -0.639                                                        | 0.029      | -0.633                      | 0.029      | -0.809                                         | 0.041      | -0.803                                         | 0.034      |                             |            |                             |            | -0.164                                         | 0.041      | -0.162                                         | 0.034      |
| SC_LA MC-ICP-MS_73  | -0.829                                                        | 0.056      | -0.859                      | 0.052      | -0.861                                         | 0.038      | -0.844                                         | 0.033      |                             |            |                             |            | -0.216                                         | 0.038      | -0.203                                         | 0.033      |
| SC_LA MC-ICP-MS_74  | -0.842                                                        | 0.029      | -0.840                      | 0.029      | -0.844                                         | 0.037      | -0.851                                         | 0.033      |                             |            |                             |            | -0.199                                         | 0.037      | -0.210                                         | 0.033      |
| SC_LA MC-ICP-MS_75  | -0.666                                                        | 0.029      | -0.660                      | 0.029      | -0.825                                         | 0.037      | -0.820                                         | 0.034      |                             |            |                             |            | -0.180                                         | 0.037      | -0.179                                         | 0.034      |
| SC_LA MC-ICP-MS_76  | -0.926                                                        | 0.030      | -0.928                      | 0.030      | -0.819                                         | 0.039      | -0.838                                         | 0.035      |                             |            |                             |            | -0.174                                         | 0.039      | -0.197                                         | 0.035      |
| SC_LA MC-ICP-MS_77  | -0.906                                                        | 0.030      | -0.902                      | 0.029      | -0.792                                         | 0.038      | -0.816                                         | 0.034      |                             |            |                             |            | -0.147                                         | 0.038      | -0.175                                         | 0.034      |
| SC_LA MC-ICP-MS_78  | -0.754                                                        | 0.030      | -0.749                      | 0.029      | -0.775                                         | 0.039      | -0.789                                         | 0.035      |                             |            |                             |            | -0.130                                         | 0.039      | -0.148                                         | 0.035      |
| SC_LA MC-ICP-MS_79  | -0.676                                                        | 0.030      | -0.674                      | 0.029      | -0.783                                         | 0.037      | -0.796                                         | 0.034      |                             |            |                             |            | -0.138                                         | 0.037      | -0.155                                         | 0.034      |
| SC_LA MC-ICP-MS_80  | -0.813                                                        | 0.030      | -0.812                      | 0.030      | -0.852                                         | 0.038      | -0.832                                         | 0.035      |                             |            |                             |            | -0.207                                         | 0.038      | -0.191                                         | 0.035      |
| SC_LA MC-ICP-MS_81  | -0.707                                                        | 0.030      | -0.706                      | 0.030      | -0.859                                         | 0.039      | -0.818                                         | 0.034      |                             |            |                             |            | -0.214                                         | 0.039      | -0.177                                         | 0.034      |
| SC_LA MC-ICP-MS_82  | -0.851                                                        | 0.031      | -0.857                      | 0.031      | -0.817                                         | 0.039      | -0.810                                         | 0.036      |                             |            |                             |            | -0.172                                         | 0.039      | -0.169                                         | 0.036      |
| MAC_LA MC-ICP-MS_01 | 0.853                                                         | 0.023      | 0.853                       | 0.023      | 0.889                                          | 0.030      | 0.884                                          | 0.039      |                             |            |                             |            | 0.700                                          | 0.030      | 0.694                                          | 0.039      |
| MAC_LA MC-ICP-MS_02 | 0.788                                                         | 0.021      | 0.788                       | 0.021      | 0.854                                          | 0.030      | 0.854                                          | 0.038      |                             |            |                             |            | 0.665                                          | 0.030      | 0.664                                          | 0.038      |
| MAC_LA MC-ICP-MS_03 | 0.900                                                         | 0.021      | 0.900                       | 0.021      | 0.838                                          | 0.030      | 0.843                                          | 0.039      |                             |            |                             |            | 0.649                                          | 0.030      | 0.653                                          | 0.039      |
| MAC_LA MC-ICP-MS_04 | 0.864                                                         | 0.019      | 0.864                       | 0.019      | 0.839                                          | 0.029      | 0.834                                          | 0.040      |                             |            |                             |            | 0.650                                          | 0.029      | 0.644                                          | 0.040      |
| MAC_LA MC-ICP-MS_05 | 0.793                                                         | 0.017      | 0.793                       | 0.017      | 0.871                                          | 0.026      | 0.880                                          | 0.039      |                             |            |                             |            | 0.682                                          | 0.026      | 0.690                                          | 0.039      |
| MAC_LA MC-ICP-MS_06 | 0.804                                                         | 0.025      | 0.804                       | 0.025      | 0.888                                          | 0.041      | 0.897                                          | 0.032      |                             |            |                             |            | 0.699                                          | 0.041      | 0.707                                          | 0.032      |
| MAC_LA MC-ICP-MS_07 | 0.913                                                         | 0.026      | 0.914                       | 0.026      | 0.863                                          | 0.040      | 0.860                                          | 0.033      |                             |            |                             |            | 0.674                                          | 0.040      | 0.670                                          | 0.033      |
| MAC_LA MC-ICP-MS_08 | 0.834                                                         | 0.025      | 0.834                       | 0.025      | 0.856                                          | 0.044      | 0.834                                          | 0.031      |                             |            |                             |            | 0.667                                          | 0.044      | 0.644                                          | 0.031      |
| MAC_LA MC-ICP-MS_09 | 0.858                                                         | 0.026      | 0.858                       | 0.026      | 0.849                                          | 0.036      | 0.857                                          | 0.030      |                             |            |                             |            | 0.660                                          | 0.036      | 0.667                                          | 0.030      |

Table S2

|                     | relative to SC (for MAC and MET) and relative to MAC (for SC) |            |                             |            |                                                |            |                                                |            | relative to NIST            |            |                             |            |                                                |            |                                                |            |
|---------------------|---------------------------------------------------------------|------------|-----------------------------|------------|------------------------------------------------|------------|------------------------------------------------|------------|-----------------------------|------------|-----------------------------|------------|------------------------------------------------|------------|------------------------------------------------|------------|
|                     | raw + blk corr                                                |            | MB-Te + blk                 |            | MB corr( <sup>119</sup> Sn/ <sup>117</sup> Sn) |            | MB corr( <sup>120</sup> Sn/ <sup>118</sup> Sn) |            | raw + blk corr              |            | MB-Te + blk                 |            | MB corr( <sup>119</sup> Sn/ <sup>117</sup> Sn) |            | MB corr( <sup>120</sup> Sn/ <sup>118</sup> Sn) |            |
|                     | $\delta^{123}\text{Sb}$ [‰]                                   | 2 $\sigma$ | $\delta^{123}\text{Sb}$ [‰] | 2 $\sigma$ | $\delta^{123}\text{Sb}$ [‰]                    | 2 $\sigma$ | $\delta^{123}\text{Sb}$ [‰]                    | 2 $\sigma$ | $\delta^{123}\text{Sb}$ [‰] | 2 $\sigma$ | $\delta^{123}\text{Sb}$ [‰] | 2 $\sigma$ | $\delta^{123}\text{Sb}$ [‰]                    | 2 $\sigma$ | $\delta^{123}\text{Sb}$ [‰]                    | 2 $\sigma$ |
| MAC_LA MC-ICP-MS_10 | 0.794                                                         | 0.026      | 0.792                       | 0.026      | 0.810                                          | 0.037      | 0.830                                          | 0.031      |                             |            |                             |            | 0.621                                          | 0.037      | 0.640                                          | 0.031      |
| MAC_LA MC-ICP-MS_11 | 0.814                                                         | 0.063      | 0.787                       | 0.029      | 0.843                                          | 0.040      | 0.847                                          | 0.034      |                             |            |                             |            | 0.654                                          | 0.040      | 0.657                                          | 0.034      |
| MAC_LA MC-ICP-MS_12 | 0.832                                                         | 0.024      | 0.833                       | 0.024      | 0.819                                          | 0.034      | 0.811                                          | 0.025      |                             |            |                             |            | 0.630                                          | 0.034      | 0.621                                          | 0.025      |
| MAC_LA MC-ICP-MS_13 | 0.783                                                         | 0.028      | 0.783                       | 0.029      | 0.856                                          | 0.033      | 0.852                                          | 0.027      |                             |            |                             |            | 0.667                                          | 0.033      | 0.662                                          | 0.027      |
| MAC_LA MC-ICP-MS_14 | 0.727                                                         | 0.025      | 0.727                       | 0.025      | 0.857                                          | 0.032      | 0.835                                          | 0.025      |                             |            |                             |            | 0.668                                          | 0.032      | 0.645                                          | 0.025      |
| MAC_LA MC-ICP-MS_15 | 0.726                                                         | 0.031      | 0.720                       | 0.030      | 0.783                                          | 0.035      | 0.771                                          | 0.030      |                             |            |                             |            | 0.594                                          | 0.035      | 0.581                                          | 0.030      |
| MAC_LA MC-ICP-MS_16 | 0.806                                                         | 0.031      | 0.805                       | 0.030      | 0.790                                          | 0.034      | 0.789                                          | 0.029      |                             |            |                             |            | 0.601                                          | 0.034      | 0.599                                          | 0.029      |
| MAC_LA MC-ICP-MS_17 | 0.823                                                         | 0.026      | 0.823                       | 0.027      | 0.832                                          | 0.034      | 0.826                                          | 0.027      |                             |            |                             |            | 0.643                                          | 0.034      | 0.636                                          | 0.027      |
| MAC_LA MC-ICP-MS_18 | 0.877                                                         | 0.025      | 0.877                       | 0.025      | 0.816                                          | 0.035      | 0.825                                          | 0.026      |                             |            |                             |            | 0.627                                          | 0.035      | 0.635                                          | 0.026      |
| MAC_LA MC-ICP-MS_19 | 0.950                                                         | 0.025      | 0.948                       | 0.025      | 0.836                                          | 0.035      | 0.807                                          | 0.027      |                             |            |                             |            | 0.647                                          | 0.035      | 0.617                                          | 0.027      |
| MAC_LA MC-ICP-MS_20 | 0.828                                                         | 0.024      | 0.830                       | 0.023      | 0.786                                          | 0.034      | 0.784                                          | 0.027      |                             |            |                             |            | 0.597                                          | 0.034      | 0.594                                          | 0.027      |
| MAC_LA MC-ICP-MS_21 | 0.847                                                         | 0.022      | 0.844                       | 0.022      | 0.826                                          | 0.035      | 0.838                                          | 0.026      |                             |            |                             |            | 0.637                                          | 0.035      | 0.648                                          | 0.026      |
| MAC_LA MC-ICP-MS_22 | 0.935                                                         | 0.020      | 0.931                       | 0.020      | 0.858                                          | 0.032      | 0.843                                          | 0.025      |                             |            |                             |            | 0.669                                          | 0.032      | 0.653                                          | 0.025      |
| MAC_LA MC-ICP-MS_23 | 0.861                                                         | 0.023      | 0.861                       | 0.022      | 0.843                                          | 0.033      | 0.827                                          | 0.026      |                             |            |                             |            | 0.654                                          | 0.033      | 0.637                                          | 0.026      |
| MAC_LA MC-ICP-MS_24 | 0.812                                                         | 0.031      | 0.814                       | 0.029      | 0.804                                          | 0.037      | 0.806                                          | 0.032      |                             |            |                             |            | 0.615                                          | 0.037      | 0.616                                          | 0.032      |
| MAC_LA MC-ICP-MS_25 | 0.717                                                         | 0.031      | 0.721                       | 0.029      | 0.771                                          | 0.037      | 0.790                                          | 0.032      |                             |            |                             |            | 0.582                                          | 0.037      | 0.600                                          | 0.032      |
| MAC_LA MC-ICP-MS_26 | 0.644                                                         | 0.025      | 0.642                       | 0.025      | 0.787                                          | 0.035      | 0.783                                          | 0.033      |                             |            |                             |            | 0.598                                          | 0.035      | 0.593                                          | 0.033      |
| MAC_LA MC-ICP-MS_27 | 0.880                                                         | 0.029      | 0.883                       | 0.027      | 0.799                                          | 0.039      | 0.805                                          | 0.034      |                             |            |                             |            | 0.610                                          | 0.039      | 0.615                                          | 0.034      |
| MAC_LA MC-ICP-MS_28 | 0.827                                                         | 0.029      | 0.825                       | 0.028      | 0.797                                          | 0.042      | 0.799                                          | 0.037      |                             |            |                             |            | 0.608                                          | 0.042      | 0.609                                          | 0.037      |
| MAC_LA MC-ICP-MS_29 | 0.814                                                         | 0.029      | 0.820                       | 0.029      | 0.796                                          | 0.043      | 0.799                                          | 0.036      |                             |            |                             |            | 0.607                                          | 0.043      | 0.609                                          | 0.036      |
| MAC_LA MC-ICP-MS_30 | 0.757                                                         | 0.032      | 0.760                       | 0.031      | 0.782                                          | 0.045      | 0.782                                          | 0.038      |                             |            |                             |            | 0.593                                          | 0.045      | 0.592                                          | 0.038      |
| MAC_LA MC-ICP-MS_31 | 0.849                                                         | 0.040      | 0.852                       | 0.040      | 0.840                                          | 0.035      | 0.841                                          | 0.031      |                             |            |                             |            | 0.651                                          | 0.035      | 0.651                                          | 0.031      |
| MAC_LA MC-ICP-MS_32 | 0.964                                                         | 0.036      | 0.966                       | 0.036      | 0.870                                          | 0.035      | 0.862                                          | 0.031      |                             |            |                             |            | 0.681                                          | 0.035      | 0.672                                          | 0.031      |
| MAC_LA MC-ICP-MS_33 | 0.924                                                         | 0.034      | 0.924                       | 0.033      | 0.852                                          | 0.039      | 0.862                                          | 0.034      |                             |            |                             |            | 0.663                                          | 0.039      | 0.672                                          | 0.034      |
| MAC_LA MC-ICP-MS_34 | 0.862                                                         | 0.032      | 0.862                       | 0.031      | 0.830                                          | 0.035      | 0.834                                          | 0.032      |                             |            |                             |            | 0.641                                          | 0.035      | 0.644                                          | 0.032      |
| MAC_LA MC-ICP-MS_35 | 0.686                                                         | 0.029      | 0.694                       | 0.029      | 0.836                                          | 0.038      | 0.828                                          | 0.032      |                             |            |                             |            | 0.647                                          | 0.038      | 0.638                                          | 0.032      |
| MAC_LA MC-ICP-MS_36 | 0.848                                                         | 0.030      | 0.847                       | 0.030      | 0.809                                          | 0.038      | 0.804                                          | 0.033      |                             |            |                             |            | 0.620                                          | 0.038      | 0.614                                          | 0.033      |
| MAC_LA MC-ICP-MS_37 | 0.811                                                         | 0.055      | 0.825                       | 0.051      | 0.858                                          | 0.037      | 0.862                                          | 0.032      |                             |            |                             |            | 0.669                                          | 0.037      | 0.672                                          | 0.032      |
| MAC_LA MC-ICP-MS_38 | 0.812                                                         | 0.028      | 0.807                       | 0.028      | 0.816                                          | 0.037      | 0.817                                          | 0.034      |                             |            |                             |            | 0.627                                          | 0.037      | 0.627                                          | 0.034      |
| MAC_LA MC-ICP-MS_39 | 0.845                                                         | 0.029      | 0.849                       | 0.030      | 0.811                                          | 0.040      | 0.806                                          | 0.035      |                             |            |                             |            | 0.622                                          | 0.040      | 0.616                                          | 0.035      |
| MET_LA MC-ICP-MS_01 | 0.428                                                         | 0.030      | 0.435                       | 0.029      | 0.473                                          | 0.042      | 0.470                                          | 0.034      |                             |            |                             |            | 0.284                                          | 0.042      | 0.280                                          | 0.034      |
| MET_LA MC-ICP-MS_02 | 0.562                                                         | 0.092      | 0.516                       | 0.030      | 0.451                                          | 0.041      | 0.461                                          | 0.036      |                             |            |                             |            | 0.262                                          | 0.041      | 0.271                                          | 0.036      |
| MET_LA MC-ICP-MS_03 | 0.562                                                         | 0.031      | 0.559                       | 0.031      | 0.489                                          | 0.040      | 0.476                                          | 0.035      |                             |            |                             |            | 0.300                                          | 0.040      | 0.286                                          | 0.035      |
| MET_LA MC-ICP-MS_04 | 0.492                                                         | 0.027      | 0.495                       | 0.027      | 0.489                                          | 0.034      | 0.486                                          | 0.028      |                             |            |                             |            | 0.300                                          | 0.034      | 0.296                                          | 0.028      |
| MET_LA MC-ICP-MS_05 | 0.409                                                         | 0.025      | 0.408                       | 0.025      | 0.447                                          | 0.032      | 0.458                                          | 0.026      |                             |            |                             |            | 0.258                                          | 0.032      | 0.268                                          | 0.026      |
| MET_LA MC-ICP-MS_06 | 0.481                                                         | 0.024      | 0.478                       | 0.023      | 0.446                                          | 0.033      | 0.455                                          | 0.025      |                             |            |                             |            | 0.257                                          | 0.033      | 0.265                                          | 0.025      |
| MET_LA MC-ICP-MS_07 | 0.428                                                         | 0.025      | 0.431                       | 0.025      | 0.427                                          | 0.033      | 0.448                                          | 0.027      |                             |            |                             |            | 0.238                                          | 0.033      | 0.258                                          | 0.027      |
| MET_LA MC-ICP-MS_08 | 0.465                                                         | 0.031      | 0.464                       | 0.030      | 0.435                                          | 0.039      | 0.433                                          | 0.033      |                             |            |                             |            | 0.246                                          | 0.039      | 0.243                                          | 0.033      |
| MET_LA MC-ICP-MS_09 | 0.387                                                         | 0.028      | 0.388                       | 0.027      | 0.417                                          | 0.036      | 0.414                                          | 0.032      |                             |            |                             |            | 0.228                                          | 0.036      | 0.224                                          | 0.032      |
| MET_LA MC-ICP-MS_10 | 0.334                                                         | 0.030      | 0.336                       | 0.030      | 0.406                                          | 0.038      | 0.401                                          | 0.033      |                             |            |                             |            | 0.217                                          | 0.038      | 0.211                                          | 0.033      |
| MET_LA MC-ICP-MS_11 | 0.474                                                         | 0.030      | 0.471                       | 0.031      | 0.376                                          | 0.038      | 0.367                                          | 0.032      |                             |            |                             |            | 0.187                                          | 0.038      | 0.177                                          | 0.032      |



Table S3

|                                         | relative to SC              |            |                             |            |                                                |            |                                                |            | relative to NIST            |            |                             |            |                                                |            |                                                |            |
|-----------------------------------------|-----------------------------|------------|-----------------------------|------------|------------------------------------------------|------------|------------------------------------------------|------------|-----------------------------|------------|-----------------------------|------------|------------------------------------------------|------------|------------------------------------------------|------------|
|                                         | raw + blk corr              |            | MB-Te + blk                 |            | MB corr( <sup>119</sup> Sn/ <sup>117</sup> Sn) |            | MB corr( <sup>120</sup> Sn/ <sup>118</sup> Sn) |            | raw + blk corr              |            | MB-Te + blk                 |            | MB corr( <sup>119</sup> Sn/ <sup>117</sup> Sn) |            | MB corr( <sup>120</sup> Sn/ <sup>118</sup> Sn) |            |
|                                         | $\delta^{123}\text{Sb}$ [‰] | 2 $\sigma$ | $\delta^{123}\text{Sb}$ [‰] | 2 $\sigma$ | $\delta^{123}\text{Sb}$ [‰]                    | 2 $\sigma$ | $\delta^{123}\text{Sb}$ [‰]                    | 2 $\sigma$ | $\delta^{123}\text{Sb}$ [‰] | 2 $\sigma$ | $\delta^{123}\text{Sb}$ [‰] | 2 $\sigma$ | $\delta^{123}\text{Sb}$ [‰]                    | 2 $\sigma$ | $\delta^{123}\text{Sb}$ [‰]                    | 2 $\sigma$ |
| <b>Senarmontite solution MC-ICP-MS:</b> |                             |            |                             |            |                                                |            |                                                |            |                             |            |                             |            |                                                |            |                                                |            |
| senar3a-untreated-2                     |                             |            |                             |            |                                                |            |                                                |            | 0.331                       | 0.035      | 0.331                       | 0.035      | 0.219                                          | 0.025      | 0.203                                          | 0.016      |
| senar3b-untreated-1                     |                             |            |                             |            |                                                |            |                                                |            | 0.189                       | 0.014      | 0.189                       | 0.014      | 0.214                                          | 0.027      | 0.222                                          | 0.018      |
| senar3b-untreated-2                     |                             |            |                             |            |                                                |            |                                                |            | 0.247                       | 0.017      | 0.247                       | 0.017      | 0.221                                          | 0.026      | 0.208                                          | 0.017      |
| senar3b-untreated-3                     |                             |            |                             |            |                                                |            |                                                |            | 0.196                       | 0.015      | 0.196                       | 0.015      | 0.209                                          | 0.026      | 0.210                                          | 0.014      |
| senar3b-untreated-4                     |                             |            |                             |            |                                                |            |                                                |            | 0.195                       | 0.014      | 0.195                       | 0.014      | 0.223                                          | 0.025      | 0.247                                          | 0.019      |
| senar3b-purified-1                      |                             |            |                             |            |                                                |            |                                                |            | 0.195                       | 0.015      | 0.195                       | 0.015      | 0.243                                          | 0.028      | 0.246                                          | 0.020      |
| senar3b-purified-2                      |                             |            |                             |            |                                                |            |                                                |            | 0.218                       | 0.017      | 0.218                       | 0.017      | 0.241                                          | 0.027      | 0.234                                          | 0.019      |
| senar3b-purified-3                      |                             |            |                             |            |                                                |            |                                                |            | 0.178                       | 0.017      | 0.178                       | 0.017      | 0.240                                          | 0.035      | 0.218                                          | 0.022      |
| senar3c-untreated-1                     |                             |            |                             |            |                                                |            |                                                |            | 0.267                       | 0.018      | 0.267                       | 0.018      | 0.216                                          | 0.027      | 0.216                                          | 0.018      |
| senar3c-untreated-2                     |                             |            |                             |            |                                                |            |                                                |            | 0.252                       | 0.015      | 0.252                       | 0.015      | 0.219                                          | 0.026      | 0.230                                          | 0.016      |
| senar3c-untreated-3                     |                             |            |                             |            |                                                |            |                                                |            | 0.230                       | 0.015      | 0.230                       | 0.015      | 0.214                                          | 0.023      | 0.220                                          | 0.021      |
| senar3c-purified-1                      |                             |            |                             |            |                                                |            |                                                |            | 0.183                       | 0.029      | 0.179                       | 0.030      | 0.221                                          | 0.031      | 0.217                                          | 0.019      |
| senar3c-purified-2                      |                             |            |                             |            |                                                |            |                                                |            | 0.197                       | 0.020      | 0.194                       | 0.020      | 0.204                                          | 0.032      | 0.222                                          | 0.021      |
| senar3c-purified-3                      |                             |            |                             |            |                                                |            |                                                |            | 0.183                       | 0.017      | 0.181                       | 0.017      | 0.223                                          | 0.033      | 0.206                                          | 0.025      |
| senar3d-untreated-1                     |                             |            |                             |            |                                                |            |                                                |            | 0.203                       | 0.018      | 0.204                       | 0.018      | 0.222                                          | 0.035      | 0.205                                          | 0.023      |
| senar3d-untreated-2                     |                             |            |                             |            |                                                |            |                                                |            | 0.199                       | 0.018      | 0.199                       | 0.018      | 0.207                                          | 0.033      | 0.202                                          | 0.024      |
| senar3d-purified-1                      |                             |            |                             |            |                                                |            |                                                |            | 0.296                       | 0.028      | 0.298                       | 0.028      | 0.231                                          | 0.030      | 0.225                                          | 0.022      |
| senar3d-purified -2                     |                             |            |                             |            |                                                |            |                                                |            | 0.255                       | 0.021      | 0.253                       | 0.020      | 0.219                                          | 0.028      | 0.223                                          | 0.022      |
| senar3e-untreated-1                     |                             |            |                             |            |                                                |            |                                                |            | 0.239                       | 0.018      | 0.239                       | 0.018      | 0.205                                          | 0.034      | 0.217                                          | 0.025      |
| senar3e-untreated-2                     |                             |            |                             |            |                                                |            |                                                |            | 0.234                       | 0.017      | 0.234                       | 0.017      | 0.207                                          | 0.032      | 0.210                                          | 0.021      |
| senar3e-untreated-3                     |                             |            |                             |            |                                                |            |                                                |            | 0.230                       | 0.018      | 0.230                       | 0.018      | 0.186                                          | 0.034      | 0.222                                          | 0.024      |
| senar3e-purified-1                      |                             |            |                             |            |                                                |            |                                                |            | 0.258                       | 0.030      | 0.258                       | 0.030      | 0.221                                          | 0.029      | 0.228                                          | 0.019      |
| senar3e-purified-2                      |                             |            |                             |            |                                                |            |                                                |            | 0.212                       | 0.020      | 0.209                       | 0.021      | 0.224                                          | 0.029      | 0.225                                          | 0.021      |
| <b>Senarmontite LA MC-ICP-MS:</b>       |                             |            |                             |            |                                                |            |                                                |            |                             |            |                             |            |                                                |            |                                                |            |
| senar1-1                                | 0.351                       | 0.020      | 0.351                       | 0.020      | 0.297                                          | 0.030      | 0.285                                          | 0.039      |                             |            |                             |            | 0.108                                          | 0.030      | 0.095                                          | 0.039      |
| senar1-2                                | 0.464                       | 0.021      | 0.464                       | 0.021      | 0.371                                          | 0.032      | 0.382                                          | 0.045      |                             |            |                             |            | 0.182                                          | 0.032      | 0.192                                          | 0.045      |
| senar1-3                                | 0.321                       | 0.025      | 0.321                       | 0.025      | 0.334                                          | 0.032      | 0.343                                          | 0.044      |                             |            |                             |            | 0.145                                          | 0.032      | 0.153                                          | 0.044      |
| senar1-4                                | 0.367                       | 0.024      | 0.367                       | 0.024      | 0.342                                          | 0.033      | 0.347                                          | 0.044      |                             |            |                             |            | 0.153                                          | 0.033      | 0.157                                          | 0.044      |
| senar1-5                                | 0.411                       | 0.025      | 0.411                       | 0.025      | 0.392                                          | 0.037      | 0.383                                          | 0.044      |                             |            |                             |            | 0.203                                          | 0.037      | 0.193                                          | 0.044      |
| senar1-6                                | 0.501                       | 0.023      | 0.501                       | 0.023      | 0.434                                          | 0.032      | 0.437                                          | 0.041      |                             |            |                             |            | 0.245                                          | 0.032      | 0.247                                          | 0.041      |
| senar1-7                                | 0.407                       | 0.022      | 0.407                       | 0.022      | 0.423                                          | 0.036      | 0.429                                          | 0.047      |                             |            |                             |            | 0.234                                          | 0.036      | 0.239                                          | 0.047      |
| senar1-8                                | 0.344                       | 0.022      | 0.344                       | 0.022      | 0.362                                          | 0.037      | 0.363                                          | 0.047      |                             |            |                             |            | 0.173                                          | 0.037      | 0.173                                          | 0.047      |
| senar1-9                                | 0.454                       | 0.030      | 0.453                       | 0.030      | 0.417                                          | 0.046      | 0.408                                          | 0.037      |                             |            |                             |            | 0.228                                          | 0.046      | 0.218                                          | 0.037      |
| senar1-10                               | 0.540                       | 0.024      | 0.540                       | 0.024      | 0.448                                          | 0.042      | 0.448                                          | 0.032      |                             |            |                             |            | 0.259                                          | 0.042      | 0.258                                          | 0.032      |
| senar2-1                                | 0.333                       | 0.021      | 0.333                       | 0.022      | 0.359                                          | 0.036      | 0.359                                          | 0.052      |                             |            |                             |            | 0.170                                          | 0.036      | 0.169                                          | 0.052      |
| senar2-2                                | 0.348                       | 0.018      | 0.348                       | 0.018      | 0.377                                          | 0.029      | 0.374                                          | 0.045      |                             |            |                             |            | 0.188                                          | 0.029      | 0.184                                          | 0.045      |
| senar2-3                                | 0.321                       | 0.021      | 0.321                       | 0.021      | 0.356                                          | 0.029      | 0.370                                          | 0.044      |                             |            |                             |            | 0.167                                          | 0.029      | 0.180                                          | 0.044      |
| senar2-4                                | 0.280                       | 0.022      | 0.280                       | 0.022      | 0.338                                          | 0.031      | 0.322                                          | 0.044      |                             |            |                             |            | 0.149                                          | 0.031      | 0.132                                          | 0.044      |
| senar2-5                                | 0.387                       | 0.023      | 0.388                       | 0.023      | 0.358                                          | 0.033      | 0.372                                          | 0.049      |                             |            |                             |            | 0.169                                          | 0.033      | 0.182                                          | 0.049      |
| senar2-6                                | 0.308                       | 0.022      | 0.309                       | 0.022      | 0.357                                          | 0.030      | 0.353                                          | 0.039      |                             |            |                             |            | 0.168                                          | 0.030      | 0.163                                          | 0.039      |
| senar2-7                                | 0.284                       | 0.028      | 0.287                       | 0.028      | 0.284                                          | 0.038      | 0.268                                          | 0.035      |                             |            |                             |            | 0.095                                          | 0.038      | 0.078                                          | 0.035      |
| senar2-8                                | 0.314                       | 0.030      | 0.317                       | 0.030      | 0.303                                          | 0.043      | 0.279                                          | 0.037      |                             |            |                             |            | 0.114                                          | 0.043      | 0.089                                          | 0.037      |
| senar2-9                                | 0.311                       | 0.031      | 0.318                       | 0.029      | 0.298                                          | 0.038      | 0.288                                          | 0.032      |                             |            |                             |            | 0.109                                          | 0.038      | 0.098                                          | 0.032      |
| senar3f-1 (surface)                     | 0.297                       | 0.030      | 0.294                       | 0.030      | 0.300                                          | 0.045      | 0.299                                          | 0.038      |                             |            |                             |            | 0.111                                          | 0.045      | 0.109                                          | 0.038      |
| senar3f-1 (lower depth)                 | 0.148                       | 0.027      | 0.145                       | 0.027      | 0.183                                          | 0.043      | 0.218                                          | 0.033      |                             |            |                             |            | -0.006                                         | 0.043      | 0.028                                          | 0.033      |
| senar3f-2 (surface)                     | 0.236                       | 0.032      | 0.233                       | 0.032      | 0.314                                          | 0.048      | 0.273                                          | 0.035      |                             |            |                             |            | 0.125                                          | 0.048      | 0.083                                          | 0.035      |
| senar3f-2 (lower depth)                 | 0.179                       | 0.026      | 0.177                       | 0.026      | 0.238                                          | 0.042      | 0.249                                          | 0.029      |                             |            |                             |            | 0.049                                          | 0.042      | 0.059                                          | 0.029      |
| senar3f-3                               | 0.359                       | 0.023      | 0.363                       | 0.024      | 0.349                                          | 0.036      | 0.311                                          | 0.027      |                             |            |                             |            | 0.160                                          | 0.036      | 0.121                                          | 0.027      |

Table S3

|                                          | relative to SC              |            |                             |            |                                                |            |                                                |            | relative to NIST            |            |                             |            |                                                |            |                                                |            |
|------------------------------------------|-----------------------------|------------|-----------------------------|------------|------------------------------------------------|------------|------------------------------------------------|------------|-----------------------------|------------|-----------------------------|------------|------------------------------------------------|------------|------------------------------------------------|------------|
|                                          | raw + blk corr              |            | MB-Te + blk                 |            | MB corr( <sup>119</sup> Sn/ <sup>117</sup> Sn) |            | MB corr( <sup>120</sup> Sn/ <sup>118</sup> Sn) |            | raw + blk corr              |            | MB-Te + blk                 |            | MB corr( <sup>119</sup> Sn/ <sup>117</sup> Sn) |            | MB corr( <sup>120</sup> Sn/ <sup>118</sup> Sn) |            |
|                                          | $\delta^{123}\text{Sb}$ [‰] | 2 $\sigma$ | $\delta^{123}\text{Sb}$ [‰] | 2 $\sigma$ | $\delta^{123}\text{Sb}$ [‰]                    | 2 $\sigma$ | $\delta^{123}\text{Sb}$ [‰]                    | 2 $\sigma$ | $\delta^{123}\text{Sb}$ [‰] | 2 $\sigma$ | $\delta^{123}\text{Sb}$ [‰] | 2 $\sigma$ | $\delta^{123}\text{Sb}$ [‰]                    | 2 $\sigma$ | $\delta^{123}\text{Sb}$ [‰]                    | 2 $\sigma$ |
| senar3f-4                                | 0.336                       | 0.035      | 0.340                       | 0.032      | 0.373                                          | 0.045      | 0.371                                          | 0.035      |                             |            |                             |            | 0.184                                          | 0.045      | 0.181                                          | 0.035      |
| senar3f-5                                | 0.441                       | 0.030      | 0.432                       | 0.028      | 0.392                                          | 0.044      | 0.387                                          | 0.032      |                             |            |                             |            | 0.203                                          | 0.044      | 0.197                                          | 0.032      |
| senar3f-6                                | 0.360                       | 0.029      | 0.359                       | 0.028      | 0.395                                          | 0.044      | 0.389                                          | 0.036      |                             |            |                             |            | 0.206                                          | 0.044      | 0.199                                          | 0.036      |
| senar3f-7                                | 0.409                       | 0.029      | 0.406                       | 0.029      | 0.357                                          | 0.044      | 0.388                                          | 0.048      |                             |            |                             |            | 0.168                                          | 0.044      | 0.198                                          | 0.048      |
| senar3f-8                                | 0.384                       | 0.030      | 0.384                       | 0.030      | 0.369                                          | 0.052      | 0.382                                          | 0.036      |                             |            |                             |            | 0.180                                          | 0.052      | 0.192                                          | 0.036      |
| senar3f-9                                | 0.334                       | 0.031      | 0.332                       | 0.031      | 0.378                                          | 0.051      | 0.364                                          | 0.038      |                             |            |                             |            | 0.189                                          | 0.051      | 0.174                                          | 0.038      |
| senar3f-10                               | 0.343                       | 0.030      | 0.343                       | 0.030      | 0.371                                          | 0.053      | 0.337                                          | 0.037      |                             |            |                             |            | 0.182                                          | 0.053      | 0.147                                          | 0.037      |
| senar3f-11                               | 0.338                       | 0.027      | 0.338                       | 0.027      | 0.328                                          | 0.047      | 0.352                                          | 0.033      |                             |            |                             |            | 0.139                                          | 0.047      | 0.162                                          | 0.033      |
| senar3f-12                               | 0.349                       | 0.027      | 0.349                       | 0.027      | 0.329                                          | 0.046      | 0.353                                          | 0.034      |                             |            |                             |            | 0.140                                          | 0.046      | 0.163                                          | 0.034      |
| senar3f-13                               | 0.357                       | 0.027      | 0.357                       | 0.027      | 0.341                                          | 0.049      | 0.344                                          | 0.035      |                             |            |                             |            | 0.152                                          | 0.049      | 0.154                                          | 0.035      |
| senar3f-14                               | 0.350                       | 0.026      | 0.350                       | 0.026      | 0.344                                          | 0.048      | 0.350                                          | 0.033      |                             |            |                             |            | 0.155                                          | 0.048      | 0.160                                          | 0.033      |
| <b>Chalcostibite solution MC-ICP-MS:</b> |                             |            |                             |            |                                                |            |                                                |            |                             |            |                             |            |                                                |            |                                                |            |
| chalk1a-untreated-1                      |                             |            |                             |            |                                                |            |                                                |            | -0.010                      | 0.035      | -0.010                      | 0.035      | -0.160                                         | 0.029      | -0.151                                         | 0.018      |
| chalk1a-untreated-3                      |                             |            |                             |            |                                                |            |                                                |            | -0.076                      | 0.019      | -0.076                      | 0.019      | -0.157                                         | 0.026      | -0.165                                         | 0.019      |
| chalk1b-untreated-1                      |                             |            |                             |            |                                                |            |                                                |            | -0.086                      | 0.017      | -0.086                      | 0.017      | -0.144                                         | 0.028      | -0.132                                         | 0.018      |
| chalk1b-untreated-2                      |                             |            |                             |            |                                                |            |                                                |            | -0.127                      | 0.015      | -0.127                      | 0.015      | -0.148                                         | 0.028      | -0.158                                         | 0.017      |
| chalk1b-untreated-3                      |                             |            |                             |            |                                                |            |                                                |            | -0.251                      | 0.017      | -0.251                      | 0.017      | -0.134                                         | 0.026      | -0.155                                         | 0.016      |
| chalk1b-untreated-4                      |                             |            |                             |            |                                                |            |                                                |            | -0.137                      | 0.015      | -0.137                      | 0.015      | -0.154                                         | 0.025      | -0.166                                         | 0.021      |
| chalk1b-purified-1                       |                             |            |                             |            |                                                |            |                                                |            | 0.008                       | 0.016      | 0.008                       | 0.016      | -0.105                                         | 0.025      | -0.102                                         | 0.018      |
| chalk1b-purified-2                       |                             |            |                             |            |                                                |            |                                                |            | -0.111                      | 0.015      | -0.111                      | 0.015      | -0.112                                         | 0.029      | -0.114                                         | 0.018      |
| chalk1b-purified-3                       |                             |            |                             |            |                                                |            |                                                |            | -0.119                      | 0.017      | -0.119                      | 0.017      | -0.092                                         | 0.037      | -0.111                                         | 0.023      |
| chalk1c-untreated-1                      |                             |            |                             |            |                                                |            |                                                |            | -0.196                      | 0.013      | -0.196                      | 0.013      | -0.162                                         | 0.027      | -0.174                                         | 0.016      |
| chalk1c-untreated-2                      |                             |            |                             |            |                                                |            |                                                |            | -0.151                      | 0.016      | -0.151                      | 0.016      | -0.164                                         | 0.025      | -0.168                                         | 0.015      |
| chalk1c-untreated-3                      |                             |            |                             |            |                                                |            |                                                |            | -0.184                      | 0.014      | -0.184                      | 0.014      | -0.190                                         | 0.025      | -0.219                                         | 0.020      |
| chalk1c-purified-1                       |                             |            |                             |            |                                                |            |                                                |            | -0.070                      | 0.017      | -0.070                      | 0.017      | -0.150                                         | 0.031      | -0.136                                         | 0.019      |
| chalk1c-purified-2                       |                             |            |                             |            |                                                |            |                                                |            | -0.089                      | 0.017      | -0.089                      | 0.017      | -0.124                                         | 0.037      | -0.127                                         | 0.024      |
| chalk1c-purified-3                       |                             |            |                             |            |                                                |            |                                                |            | -0.114                      | 0.020      | -0.114                      | 0.020      | -0.124                                         | 0.037      | -0.152                                         | 0.024      |
| <b>Chalcostibite LA MC-ICP-MS:</b>       |                             |            |                             |            |                                                |            |                                                |            |                             |            |                             |            |                                                |            |                                                |            |
| chalk1d-1                                | 0.000                       | 0.033      | -0.001                      | 0.033      | -0.144                                         | 0.040      | -0.135                                         | 0.036      |                             |            |                             |            | -0.333                                         | 0.040      | -0.325                                         | 0.036      |
| chalk1d-2                                | -0.087                      | 0.031      | -0.088                      | 0.030      | -0.050                                         | 0.039      | -0.033                                         | 0.036      |                             |            |                             |            | -0.239                                         | 0.039      | -0.223                                         | 0.036      |
| chalk1d-3                                | 0.088                       | 0.025      | 0.090                       | 0.025      | 0.041                                          | 0.035      | 0.017                                          | 0.030      |                             |            |                             |            | -0.148                                         | 0.035      | -0.173                                         | 0.030      |
| chalk1d-4                                | -0.126                      | 0.026      | -0.126                      | 0.026      | -0.059                                         | 0.036      | -0.045                                         | 0.030      |                             |            |                             |            | -0.248                                         | 0.036      | -0.235                                         | 0.030      |
| chalk1d-5                                | -0.136                      | 0.025      | -0.137                      | 0.025      | -0.131                                         | 0.036      | -0.132                                         | 0.031      |                             |            |                             |            | -0.320                                         | 0.036      | -0.322                                         | 0.031      |
| chalk1d-6                                | -0.066                      | 0.027      | -0.067                      | 0.027      | -0.080                                         | 0.037      | -0.084                                         | 0.031      |                             |            |                             |            | -0.269                                         | 0.037      | -0.274                                         | 0.031      |
| chalk1d-7                                | -0.143                      | 0.039      | -0.143                      | 0.039      | -0.131                                         | 0.065      | -0.139                                         | 0.050      |                             |            |                             |            | -0.320                                         | 0.065      | -0.329                                         | 0.050      |
| chalk1d-8                                | 0.089                       | 0.039      | 0.088                       | 0.039      | 0.084                                          | 0.060      | 0.069                                          | 0.045      |                             |            |                             |            | -0.105                                         | 0.060      | -0.121                                         | 0.045      |
| chalk1d-9                                | -0.032                      | 0.027      | -0.032                      | 0.027      | -0.044                                         | 0.051      | -0.038                                         | 0.035      |                             |            |                             |            | -0.233                                         | 0.051      | -0.228                                         | 0.035      |
| chalk1d-10                               | -0.079                      | 0.032      | -0.079                      | 0.032      | -0.093                                         | 0.055      | -0.087                                         | 0.039      |                             |            |                             |            | -0.282                                         | 0.055      | -0.277                                         | 0.039      |
| chalk1d-11                               | -0.048                      | 0.037      | -0.048                      | 0.037      | -0.079                                         | 0.070      | -0.067                                         | 0.044      |                             |            |                             |            | -0.268                                         | 0.070      | -0.257                                         | 0.044      |
| chalk1d-12                               | -0.097                      | 0.026      | -0.098                      | 0.026      | -0.088                                         | 0.049      | -0.103                                         | 0.039      |                             |            |                             |            | -0.277                                         | 0.049      | -0.293                                         | 0.039      |
| chalk1d-13                               | -0.083                      | 0.028      | -0.083                      | 0.028      | -0.111                                         | 0.051      | -0.107                                         | 0.040      |                             |            |                             |            | -0.300                                         | 0.051      | -0.297                                         | 0.040      |
| chalk1d-14                               | -0.141                      | 0.027      | -0.142                      | 0.027      | -0.144                                         | 0.051      | -0.138                                         | 0.038      |                             |            |                             |            | -0.333                                         | 0.051      | -0.328                                         | 0.038      |
| chalk1d-15                               | -0.042                      | 0.029      | -0.042                      | 0.029      | -0.027                                         | 0.054      | -0.053                                         | 0.041      |                             |            |                             |            | -0.216                                         | 0.054      | -0.243                                         | 0.041      |
| chalk1d-16                               | 0.001                       | 0.030      | 0.001                       | 0.030      | 0.001                                          | 0.054      | 0.008                                          | 0.039      |                             |            |                             |            | -0.188                                         | 0.054      | -0.182                                         | 0.039      |
| chalk1d-17                               | -0.104                      | 0.030      | -0.103                      | 0.030      | -0.124                                         | 0.055      | -0.112                                         | 0.037      |                             |            |                             |            | -0.313                                         | 0.055      | -0.302                                         | 0.037      |
| chalk1d-18                               | -0.082                      | 0.032      | -0.082                      | 0.032      | -0.104                                         | 0.058      | -0.096                                         | 0.041      |                             |            |                             |            | -0.293                                         | 0.058      | -0.286                                         | 0.041      |
| chalk1d-19                               | -0.146                      | 0.030      | -0.146                      | 0.030      | -0.150                                         | 0.057      | -0.151                                         | 0.038      |                             |            |                             |            | -0.339                                         | 0.057      | -0.341                                         | 0.038      |
| chalk2-1                                 | -0.050                      | 0.019      | -0.050                      | 0.019      | -0.006                                         | 0.028      | -0.003                                         | 0.038      |                             |            |                             |            | -0.195                                         | 0.028      | -0.193                                         | 0.038      |

Table S3

|                                         | relative to SC              |            |                             |            |                                                |            |                                                |            | relative to NIST            |            |                             |            |                                                |            |                                                |            |
|-----------------------------------------|-----------------------------|------------|-----------------------------|------------|------------------------------------------------|------------|------------------------------------------------|------------|-----------------------------|------------|-----------------------------|------------|------------------------------------------------|------------|------------------------------------------------|------------|
|                                         | raw + blk corr              |            | MB-Te + blk                 |            | MB corr( <sup>119</sup> Sn/ <sup>117</sup> Sn) |            | MB corr( <sup>120</sup> Sn/ <sup>118</sup> Sn) |            | raw + blk corr              |            | MB-Te + blk                 |            | MB corr( <sup>119</sup> Sn/ <sup>117</sup> Sn) |            | MB corr( <sup>120</sup> Sn/ <sup>118</sup> Sn) |            |
|                                         | $\delta^{123}\text{Sb}$ [‰] | 2 $\sigma$ | $\delta^{123}\text{Sb}$ [‰] | 2 $\sigma$ | $\delta^{123}\text{Sb}$ [‰]                    | 2 $\sigma$ | $\delta^{123}\text{Sb}$ [‰]                    | 2 $\sigma$ | $\delta^{123}\text{Sb}$ [‰] | 2 $\sigma$ | $\delta^{123}\text{Sb}$ [‰] | 2 $\sigma$ | $\delta^{123}\text{Sb}$ [‰]                    | 2 $\sigma$ | $\delta^{123}\text{Sb}$ [‰]                    | 2 $\sigma$ |
| chalk2-2                                | -0.167                      | 0.019      | -0.167                      | 0.019      | -0.025                                         | 0.030      | -0.011                                         | 0.038      |                             |            |                             |            | -0.214                                         | 0.030      | -0.201                                         | 0.038      |
| chalk2-3                                | -0.015                      | 0.020      | -0.015                      | 0.020      | -0.015                                         | 0.029      | -0.031                                         | 0.039      |                             |            |                             |            | -0.204                                         | 0.029      | -0.221                                         | 0.039      |
| chalk2-4                                | -0.083                      | 0.019      | -0.083                      | 0.019      | -0.013                                         | 0.029      | -0.017                                         | 0.039      |                             |            |                             |            | -0.202                                         | 0.029      | -0.207                                         | 0.039      |
| <b>Zinkenite solution MC-ICP-MS:</b>    |                             |            |                             |            |                                                |            |                                                |            |                             |            |                             |            |                                                |            |                                                |            |
| zink1a-untreated-1                      |                             |            |                             |            |                                                |            |                                                |            | -0.331                      | 0.017      | -0.331                      | 0.017      | -0.375                                         | 0.029      | -0.380                                         | 0.023      |
| zink1b-untreated-1                      |                             |            |                             |            |                                                |            |                                                |            | -0.378                      | 0.019      | -0.375                      | 0.019      | -0.365                                         | 0.030      | -0.369                                         | 0.023      |
| zink1c-untreated-1                      |                             |            |                             |            |                                                |            |                                                |            | -0.351                      | 0.017      | -0.349                      | 0.017      | -0.374                                         | 0.031      | -0.380                                         | 0.023      |
| zink1a-purified-1                       |                             |            |                             |            |                                                |            |                                                |            | -0.329                      | 0.031      | -0.324                      | 0.031      | -0.382                                         | 0.029      | -0.366                                         | 0.020      |
| zink1a-purified-2                       |                             |            |                             |            |                                                |            |                                                |            | -0.312                      | 0.023      | -0.314                      | 0.023      | -0.372                                         | 0.031      | -0.371                                         | 0.020      |
| zink1a-purified-3                       |                             |            |                             |            |                                                |            |                                                |            | -0.321                      | 0.016      | -0.321                      | 0.016      | -0.346                                         | 0.034      | -0.376                                         | 0.022      |
| zink1b-purified-1                       |                             |            |                             |            |                                                |            |                                                |            | -0.314                      | 0.032      | -0.312                      | 0.033      | -0.369                                         | 0.029      | -0.382                                         | 0.020      |
| zink1b-purified-2                       |                             |            |                             |            |                                                |            |                                                |            | -0.306                      | 0.020      | -0.304                      | 0.021      | -0.390                                         | 0.029      | -0.375                                         | 0.019      |
| zink1b-purified-3                       |                             |            |                             |            |                                                |            |                                                |            | -0.365                      | 0.017      | -0.363                      | 0.016      | -0.379                                         | 0.033      | -0.377                                         | 0.023      |
| zink1c-purified-1                       |                             |            |                             |            |                                                |            |                                                |            | -0.370                      | 0.025      | -0.370                      | 0.026      | -0.374                                         | 0.028      | -0.371                                         | 0.020      |
| zink1c-purified-2                       |                             |            |                             |            |                                                |            |                                                |            | -0.380                      | 0.023      | -0.382                      | 0.024      | -0.370                                         | 0.028      | -0.369                                         | 0.022      |
| zink1c-purified-3                       |                             |            |                             |            |                                                |            |                                                |            | -0.328                      | 0.015      | -0.329                      | 0.015      | -0.367                                         | 0.030      | -0.359                                         | 0.022      |
| <b>Zinkenite LA MC-ICP-MS:</b>          |                             |            |                             |            |                                                |            |                                                |            |                             |            |                             |            |                                                |            |                                                |            |
| zink1d-1                                | -0.194                      | 0.031      | -0.191                      | 0.031      | -0.197                                         | 0.042      | -0.202                                         | 0.042      |                             |            |                             |            | -0.386                                         | 0.042      | -0.392                                         | 0.042      |
| zink1d-2                                | -0.205                      | 0.030      | -0.206                      | 0.029      | -0.159                                         | 0.039      | -0.174                                         | 0.033      |                             |            |                             |            | -0.348                                         | 0.039      | -0.364                                         | 0.033      |
| zink1d-3                                | -0.239                      | 0.028      | -0.239                      | 0.029      | -0.162                                         | 0.039      | -0.172                                         | 0.034      |                             |            |                             |            | -0.351                                         | 0.039      | -0.362                                         | 0.034      |
| zink1e-1                                | -0.256                      | 0.029      | -0.258                      | 0.029      | -0.161                                         | 0.040      | -0.174                                         | 0.034      |                             |            |                             |            | -0.350                                         | 0.040      | -0.364                                         | 0.034      |
| zink1e-2                                | -0.256                      | 0.028      | -0.261                      | 0.029      | -0.168                                         | 0.039      | -0.175                                         | 0.035      |                             |            |                             |            | -0.357                                         | 0.039      | -0.365                                         | 0.035      |
| zink1e-3                                | -0.151                      | 0.028      | -0.152                      | 0.028      | -0.186                                         | 0.038      | -0.162                                         | 0.034      |                             |            |                             |            | -0.375                                         | 0.038      | -0.352                                         | 0.034      |
| <b>Boulangerite solution MC-ICP-MS:</b> |                             |            |                             |            |                                                |            |                                                |            |                             |            |                             |            |                                                |            |                                                |            |
| boula2a-untreated-2                     |                             |            |                             |            |                                                |            |                                                |            | 0.788                       | 0.021      | 0.788                       | 0.021      | 0.708                                          | 0.031      | 0.704                                          | 0.023      |
| boula2a-untreated-3                     |                             |            |                             |            |                                                |            |                                                |            | 0.850                       | 0.024      | 0.850                       | 0.024      | 0.724                                          | 0.037      | 0.724                                          | 0.026      |
| boula2b-untreated-1                     |                             |            |                             |            |                                                |            |                                                |            | 0.213                       | 0.019      | 0.213                       | 0.019      | 0.160                                          | 0.024      | 0.174                                          | 0.016      |
| boula2b-untreated-2                     |                             |            |                             |            |                                                |            |                                                |            | 0.261                       | 0.019      | 0.261                       | 0.019      | 0.179                                          | 0.024      | 0.171                                          | 0.018      |
| boula2b-untreated-3                     |                             |            |                             |            |                                                |            |                                                |            | 0.270                       | 0.021      | 0.270                       | 0.021      | 0.181                                          | 0.024      | 0.202                                          | 0.019      |
| boula2c-untreated-1                     |                             |            |                             |            |                                                |            |                                                |            | 0.172                       | 0.019      | 0.172                       | 0.019      | 0.160                                          | 0.028      | 0.170                                          | 0.019      |
| boula2c-untreated-2                     |                             |            |                             |            |                                                |            |                                                |            | 0.129                       | 0.019      | 0.129                       | 0.019      | 0.160                                          | 0.026      | 0.163                                          | 0.018      |
| boula2c-untreated-3                     |                             |            |                             |            |                                                |            |                                                |            | 0.080                       | 0.018      | 0.081                       | 0.018      | 0.153                                          | 0.027      | 0.161                                          | 0.020      |
| boula2c-untreated-4                     |                             |            |                             |            |                                                |            |                                                |            | 0.116                       | 0.018      | 0.116                       | 0.018      | 0.180                                          | 0.024      | 0.171                                          | 0.019      |
| boula2d-untreated-1                     |                             |            |                             |            |                                                |            |                                                |            | 0.425                       | 0.020      | 0.424                       | 0.021      | 0.412                                          | 0.035      | 0.418                                          | 0.022      |
| boula2d-untreated-2                     |                             |            |                             |            |                                                |            |                                                |            | 0.449                       | 0.018      | 0.450                       | 0.018      | 0.412                                          | 0.033      | 0.435                                          | 0.025      |
| boula2d-purified-1                      |                             |            |                             |            |                                                |            |                                                |            | 0.456                       | 0.033      | 0.457                       | 0.034      | 0.431                                          | 0.027      | 0.410                                          | 0.019      |
| boula2d-purified-2                      |                             |            |                             |            |                                                |            |                                                |            | 0.430                       | 0.022      | 0.431                       | 0.022      | 0.406                                          | 0.030      | 0.429                                          | 0.022      |
| boula2d-purified-3                      |                             |            |                             |            |                                                |            |                                                |            | 0.450                       | 0.018      | 0.450                       | 0.018      | 0.412                                          | 0.035      | 0.410                                          | 0.021      |
| boula2e-untreated-1                     |                             |            |                             |            |                                                |            |                                                |            | 0.359                       | 0.017      | 0.359                       | 0.017      | 0.379                                          | 0.029      | 0.390                                          | 0.022      |
| boula2e-untreated-2                     |                             |            |                             |            |                                                |            |                                                |            | 0.361                       | 0.018      | 0.361                       | 0.018      | 0.406                                          | 0.035      | 0.396                                          | 0.020      |
| boula2e-untreated-3                     |                             |            |                             |            |                                                |            |                                                |            | 0.360                       | 0.016      | 0.361                       | 0.016      | 0.359                                          | 0.034      | 0.388                                          | 0.021      |
| boula2e-purified-1                      |                             |            |                             |            |                                                |            |                                                |            | 0.446                       | 0.033      | 0.446                       | 0.033      | 0.405                                          | 0.030      | 0.382                                          | 0.018      |
| boula2e-purified-2                      |                             |            |                             |            |                                                |            |                                                |            | 0.473                       | 0.023      | 0.474                       | 0.023      | 0.391                                          | 0.029      | 0.379                                          | 0.021      |
| boula2e-purified-3                      |                             |            |                             |            |                                                |            |                                                |            | 0.393                       | 0.015      | 0.393                       | 0.015      | 0.393                                          | 0.033      | 0.384                                          | 0.020      |

Table S3

|                                       | relative to SC              |            |                             |            |                                                |            |                                                |            | relative to NIST            |            |                             |            |                                                |            |                                                |            |
|---------------------------------------|-----------------------------|------------|-----------------------------|------------|------------------------------------------------|------------|------------------------------------------------|------------|-----------------------------|------------|-----------------------------|------------|------------------------------------------------|------------|------------------------------------------------|------------|
|                                       | raw + blk corr              |            | MB-Te + blk                 |            | MB corr( <sup>119</sup> Sn/ <sup>117</sup> Sn) |            | MB corr( <sup>120</sup> Sn/ <sup>118</sup> Sn) |            | raw + blk corr              |            | MB-Te + blk                 |            | MB corr( <sup>119</sup> Sn/ <sup>117</sup> Sn) |            | MB corr( <sup>120</sup> Sn/ <sup>118</sup> Sn) |            |
|                                       | $\delta^{123}\text{Sb}$ [‰] | 2 $\sigma$ | $\delta^{123}\text{Sb}$ [‰] | 2 $\sigma$ | $\delta^{123}\text{Sb}$ [‰]                    | 2 $\sigma$ | $\delta^{123}\text{Sb}$ [‰]                    | 2 $\sigma$ | $\delta^{123}\text{Sb}$ [‰] | 2 $\sigma$ | $\delta^{123}\text{Sb}$ [‰] | 2 $\sigma$ | $\delta^{123}\text{Sb}$ [‰]                    | 2 $\sigma$ | $\delta^{123}\text{Sb}$ [‰]                    | 2 $\sigma$ |
| <b>Boulangerite LA MC-ICP-MS</b>      |                             |            |                             |            |                                                |            |                                                |            |                             |            |                             |            |                                                |            |                                                |            |
| boula2f-1                             | 0.458                       | 0.022      | 0.458                       | 0.022      | 0.413                                          | 0.036      | 0.411                                          | 0.027      |                             |            |                             |            | 0.224                                          | 0.036      | 0.221                                          | 0.027      |
| boula2f-3                             | 0.699                       | 0.028      | 0.698                       | 0.028      | 0.666                                          | 0.045      | 0.671                                          | 0.034      |                             |            |                             |            | 0.477                                          | 0.045      | 0.481                                          | 0.034      |
| boula2f-4                             | 0.665                       | 0.027      | 0.665                       | 0.027      | 0.675                                          | 0.044      | 0.672                                          | 0.032      |                             |            |                             |            | 0.486                                          | 0.044      | 0.482                                          | 0.032      |
| boula2f-5                             | 0.665                       | 0.022      | 0.665                       | 0.022      | 0.701                                          | 0.042      | 0.691                                          | 0.030      |                             |            |                             |            | 0.512                                          | 0.042      | 0.501                                          | 0.030      |
| boula2f-6                             | 0.688                       | 0.022      | 0.688                       | 0.022      | 0.763                                          | 0.041      | 0.747                                          | 0.031      |                             |            |                             |            | 0.574                                          | 0.041      | 0.557                                          | 0.031      |
| boula2f-7                             | 0.822                       | 0.022      | 0.821                       | 0.022      | 0.859                                          | 0.040      | 0.869                                          | 0.030      |                             |            |                             |            | 0.670                                          | 0.040      | 0.679                                          | 0.030      |
| boula2f-8                             | 0.378                       | 0.024      | 0.378                       | 0.024      | 0.352                                          | 0.040      | 0.370                                          | 0.031      |                             |            |                             |            | 0.163                                          | 0.040      | 0.180                                          | 0.031      |
| boula2f-9                             | 0.366                       | 0.026      | 0.362                       | 0.027      | 0.464                                          | 0.034      | 0.458                                          | 0.028      |                             |            |                             |            | 0.275                                          | 0.034      | 0.268                                          | 0.028      |
| boula2f-10                            | 0.747                       | 0.030      | 0.744                       | 0.030      | 0.849                                          | 0.032      | 0.857                                          | 0.028      |                             |            |                             |            | 0.660                                          | 0.032      | 0.667                                          | 0.028      |
| boula2f-11                            | 0.727                       | 0.024      | 0.723                       | 0.024      | 0.723                                          | 0.033      | 0.733                                          | 0.027      |                             |            |                             |            | 0.534                                          | 0.033      | 0.543                                          | 0.027      |
| boula2f-12                            | 0.622                       | 0.025      | 0.617                       | 0.024      | 0.628                                          | 0.035      | 0.638                                          | 0.028      |                             |            |                             |            | 0.439                                          | 0.035      | 0.448                                          | 0.028      |
| boula1-1                              | 0.333                       | 0.025      | 0.332                       | 0.025      | 0.395                                          | 0.043      | 0.413                                          | 0.034      |                             |            |                             |            | 0.206                                          | 0.043      | 0.223                                          | 0.034      |
| boula1-2                              | 0.334                       | 0.023      | 0.334                       | 0.023      | 0.344                                          | 0.040      | 0.352                                          | 0.029      |                             |            |                             |            | 0.155                                          | 0.040      | 0.162                                          | 0.029      |
| boula1-3                              | 0.303                       | 0.023      | 0.303                       | 0.023      | 0.385                                          | 0.041      | 0.395                                          | 0.029      |                             |            |                             |            | 0.196                                          | 0.041      | 0.205                                          | 0.029      |
| boula1-4                              | 0.437                       | 0.025      | 0.439                       | 0.025      | 0.398                                          | 0.033      | 0.408                                          | 0.027      |                             |            |                             |            | 0.209                                          | 0.033      | 0.218                                          | 0.027      |
| boula1-5                              | 0.415                       | 0.025      | 0.413                       | 0.024      | 0.433                                          | 0.032      | 0.436                                          | 0.027      |                             |            |                             |            | 0.244                                          | 0.032      | 0.246                                          | 0.027      |
| boula1-6                              | 0.572                       | 0.028      | 0.575                       | 0.027      | 0.597                                          | 0.033      | 0.612                                          | 0.027      |                             |            |                             |            | 0.408                                          | 0.033      | 0.422                                          | 0.027      |
| boula1-7                              | 0.266                       | 0.025      | 0.266                       | 0.024      | 0.320                                          | 0.033      | 0.324                                          | 0.027      |                             |            |                             |            | 0.131                                          | 0.033      | 0.134                                          | 0.027      |
| <b>Bournonite solution MC-ICP-MS:</b> |                             |            |                             |            |                                                |            |                                                |            |                             |            |                             |            |                                                |            |                                                |            |
| bourn1a-untreated-1                   |                             |            |                             |            |                                                |            |                                                |            | 0.443                       | 0.018      | 0.443                       | 0.018      | 0.306                                          | 0.026      | 0.303                                          | 0.016      |
| bourn1a-untreated-2                   |                             |            |                             |            |                                                |            |                                                |            | 0.389                       | 0.016      | 0.388                       | 0.016      | 0.294                                          | 0.025      | 0.290                                          | 0.014      |
| bourn1a-untreated-3                   |                             |            |                             |            |                                                |            |                                                |            | 0.371                       | 0.013      | 0.371                       | 0.013      | 0.316                                          | 0.024      | 0.325                                          | 0.017      |
| bourn2a-untreated-1                   |                             |            |                             |            |                                                |            |                                                |            | 0.608                       | 0.021      | 0.608                       | 0.021      | 0.555                                          | 0.029      | 0.573                                          | 0.023      |
| bourn2a-untreated-2                   |                             |            |                             |            |                                                |            |                                                |            | 0.709                       | 0.027      | 0.709                       | 0.027      | 0.573                                          | 0.037      | 0.574                                          | 0.028      |
| bourn2b-untreated-1                   |                             |            |                             |            |                                                |            |                                                |            | 0.481                       | 0.019      | 0.481                       | 0.019      | 0.398                                          | 0.026      | 0.403                                          | 0.017      |
| bourn2b-untreated-2                   |                             |            |                             |            |                                                |            |                                                |            | 0.465                       | 0.017      | 0.465                       | 0.017      | 0.409                                          | 0.025      | 0.398                                          | 0.015      |
| bourn2b-untreated-3                   |                             |            |                             |            |                                                |            |                                                |            | 0.427                       | 0.014      | 0.427                       | 0.014      | 0.389                                          | 0.024      | 0.385                                          | 0.018      |
| bourn2c-untreated-1                   |                             |            |                             |            |                                                |            |                                                |            | 0.145                       | 0.018      | 0.144                       | 0.018      | 0.151                                          | 0.032      | 0.171                                          | 0.023      |
| bourn2c-untreated-2                   |                             |            |                             |            |                                                |            |                                                |            | 0.199                       | 0.017      | 0.199                       | 0.017      | 0.138                                          | 0.033      | 0.163                                          | 0.024      |
| bourn2c-purified-1                    |                             |            |                             |            |                                                |            |                                                |            | 0.233                       | 0.029      | 0.236                       | 0.029      | 0.160                                          | 0.029      | 0.154                                          | 0.021      |
| bourn2c-purified-2                    |                             |            |                             |            |                                                |            |                                                |            | 0.258                       | 0.023      | 0.258                       | 0.023      | 0.185                                          | 0.029      | 0.182                                          | 0.021      |
| bourn2c-purified-3                    |                             |            |                             |            |                                                |            |                                                |            | 0.172                       | 0.017      | 0.172                       | 0.017      | 0.148                                          | 0.031      | 0.160                                          | 0.023      |
| bourn2d-untreated-1                   |                             |            |                             |            |                                                |            |                                                |            | 0.233                       | 0.018      | 0.232                       | 0.018      | 0.186                                          | 0.030      | 0.187                                          | 0.020      |
| bourn2d-purified-1                    |                             |            |                             |            |                                                |            |                                                |            | 0.225                       | 0.028      | 0.231                       | 0.029      | 0.201                                          | 0.029      | 0.185                                          | 0.021      |
| bourn2d-purified-2                    |                             |            |                             |            |                                                |            |                                                |            | 0.218                       | 0.021      | 0.218                       | 0.021      | 0.175                                          | 0.028      | 0.183                                          | 0.022      |
| bourn2d-purified-3                    |                             |            |                             |            |                                                |            |                                                |            | 0.220                       | 0.018      | 0.220                       | 0.018      | 0.150                                          | 0.032      | 0.175                                          | 0.025      |
| <b>Bournonite LA MC-ICP-MS:</b>       |                             |            |                             |            |                                                |            |                                                |            |                             |            |                             |            |                                                |            |                                                |            |
| bourn1b-1                             | 0.461                       | 0.023      | 0.461                       | 0.023      | 0.412                                          | 0.040      | 0.391                                          | 0.029      |                             |            |                             |            | 0.223                                          | 0.040      | 0.201                                          | 0.029      |
| bourn1b-2                             | 0.657                       | 0.023      | 0.657                       | 0.023      | 0.579                                          | 0.040      | 0.584                                          | 0.031      |                             |            |                             |            | 0.390                                          | 0.040      | 0.394                                          | 0.031      |
| bourn1b-3                             | 0.598                       | 0.022      | 0.598                       | 0.022      | 0.572                                          | 0.039      | 0.566                                          | 0.029      |                             |            |                             |            | 0.383                                          | 0.039      | 0.376                                          | 0.029      |
| bourn1b-4                             | 0.416                       | 0.022      | 0.416                       | 0.022      | 0.438                                          | 0.038      | 0.436                                          | 0.028      |                             |            |                             |            | 0.249                                          | 0.038      | 0.246                                          | 0.028      |
| bourn1b-5                             | 0.481                       | 0.024      | 0.481                       | 0.024      | 0.494                                          | 0.039      | 0.471                                          | 0.029      |                             |            |                             |            | 0.305                                          | 0.039      | 0.281                                          | 0.029      |
| bourn1b-6                             | 0.478                       | 0.024      | 0.477                       | 0.024      | 0.450                                          | 0.042      | 0.442                                          | 0.030      |                             |            |                             |            | 0.261                                          | 0.042      | 0.252                                          | 0.030      |
| bourn1b-7                             | 0.430                       | 0.023      | 0.430                       | 0.023      | 0.424                                          | 0.039      | 0.418                                          | 0.029      |                             |            |                             |            | 0.235                                          | 0.039      | 0.228                                          | 0.029      |
| bourn1b-8                             | 0.442                       | 0.024      | 0.441                       | 0.024      | 0.436                                          | 0.042      | 0.407                                          | 0.029      |                             |            |                             |            | 0.247                                          | 0.042      | 0.217                                          | 0.029      |
| bourn1b-9                             | 0.527                       | 0.024      | 0.527                       | 0.024      | 0.481                                          | 0.041      | 0.487                                          | 0.030      |                             |            |                             |            | 0.292                                          | 0.041      | 0.297                                          | 0.030      |
| bourn3-1                              | 0.434                       | 0.025      | 0.434                       | 0.026      | 0.443                                          | 0.032      | 0.469                                          | 0.027      |                             |            |                             |            | 0.254                                          | 0.032      | 0.279                                          | 0.027      |

Table S3

|                                         | relative to SC              |            |                             |            |                                                |            |                                                |            | relative to NIST            |            |                             |            |                                                |            |                                                |            |
|-----------------------------------------|-----------------------------|------------|-----------------------------|------------|------------------------------------------------|------------|------------------------------------------------|------------|-----------------------------|------------|-----------------------------|------------|------------------------------------------------|------------|------------------------------------------------|------------|
|                                         | raw + blk corr              |            | MB-Te + blk                 |            | MB corr( <sup>119</sup> Sn/ <sup>117</sup> Sn) |            | MB corr( <sup>120</sup> Sn/ <sup>118</sup> Sn) |            | raw + blk corr              |            | MB-Te + blk                 |            | MB corr( <sup>119</sup> Sn/ <sup>117</sup> Sn) |            | MB corr( <sup>120</sup> Sn/ <sup>118</sup> Sn) |            |
|                                         | $\delta^{123}\text{Sb}$ [‰] | 2 $\sigma$ | $\delta^{123}\text{Sb}$ [‰] | 2 $\sigma$ | $\delta^{123}\text{Sb}$ [‰]                    | 2 $\sigma$ | $\delta^{123}\text{Sb}$ [‰]                    | 2 $\sigma$ | $\delta^{123}\text{Sb}$ [‰] | 2 $\sigma$ | $\delta^{123}\text{Sb}$ [‰] | 2 $\sigma$ | $\delta^{123}\text{Sb}$ [‰]                    | 2 $\sigma$ | $\delta^{123}\text{Sb}$ [‰]                    | 2 $\sigma$ |
| bourn3-2                                | 0.275                       | 0.029      | 0.272                       | 0.029      | 0.298                                          | 0.033      | 0.302                                          | 0.028      |                             |            |                             |            | 0.109                                          | 0.033      | 0.112                                          | 0.028      |
| bourn3-3                                | 0.476                       | 0.029      | 0.469                       | 0.029      | 0.427                                          | 0.032      | 0.420                                          | 0.028      |                             |            |                             |            | 0.238                                          | 0.032      | 0.230                                          | 0.028      |
| bourn3-4                                | 0.723                       | 0.026      | 0.724                       | 0.026      | 0.578                                          | 0.032      | 0.584                                          | 0.027      |                             |            |                             |            | 0.389                                          | 0.032      | 0.394                                          | 0.027      |
| bourn3-5                                | 0.562                       | 0.026      | 0.559                       | 0.026      | 0.554                                          | 0.031      | 0.532                                          | 0.028      |                             |            |                             |            | 0.365                                          | 0.031      | 0.342                                          | 0.028      |
| bourn3-6                                | 0.505                       | 0.026      | 0.504                       | 0.025      | 0.476                                          | 0.032      | 0.479                                          | 0.028      |                             |            |                             |            | 0.287                                          | 0.032      | 0.289                                          | 0.028      |
| <b>Tetrahedrite solution MC-ICP-MS:</b> |                             |            |                             |            |                                                |            |                                                |            |                             |            |                             |            |                                                |            |                                                |            |
| Tetra1a-untreated-1                     |                             |            |                             |            |                                                |            |                                                |            | 0.283                       | 0.025      | 0.283                       | 0.025      | 0.181                                          | 0.028      | 0.194                                          | 0.019      |
| Tetra1a-untreated-3                     |                             |            |                             |            |                                                |            |                                                |            | 0.309                       | 0.022      | 0.309                       | 0.022      | 0.198                                          | 0.026      | 0.195                                          | 0.018      |
| Tetra1b-untreated-1                     |                             |            |                             |            |                                                |            |                                                |            | 0.195                       | 0.017      | 0.195                       | 0.017      | 0.179                                          | 0.028      | 0.171                                          | 0.018      |
| Tetra1b-untreated-2                     |                             |            |                             |            |                                                |            |                                                |            | 0.251                       | 0.019      | 0.251                       | 0.019      | 0.169                                          | 0.024      | 0.166                                          | 0.017      |
| Tetra1b-purified-1                      |                             |            |                             |            |                                                |            |                                                |            | 0.258                       | 0.017      | 0.258                       | 0.017      | 0.206                                          | 0.038      | 0.199                                          | 0.021      |
| Tetra1b-purified-2                      |                             |            |                             |            |                                                |            |                                                |            | 0.065                       | 0.018      | 0.065                       | 0.018      | 0.174                                          | 0.040      | 0.161                                          | 0.025      |
| Tetra1b-purified-3                      |                             |            |                             |            |                                                |            |                                                |            | 0.173                       | 0.030      | 0.173                       | 0.030      | 0.160                                          | 0.033      | 0.159                                          | 0.020      |
| <b>Tetrahedrite LA MC-ICP-MS:</b>       |                             |            |                             |            |                                                |            |                                                |            |                             |            |                             |            |                                                |            |                                                |            |
| Tetra1c-1                               | 0.373                       | 0.040      | 0.373                       | 0.041      | 0.367                                          | 0.043      | 0.325                                          | 0.061      |                             |            |                             |            | 0.178                                          | 0.043      | 0.135                                          | 0.061      |
| Tetra1c-2                               | 0.376                       | 0.035      | 0.376                       | 0.035      | 0.297                                          | 0.037      | 0.259                                          | 0.059      |                             |            |                             |            | 0.108                                          | 0.037      | 0.069                                          | 0.059      |
| Tetra1c-3                               | 0.497                       | 0.028      | 0.497                       | 0.028      | 0.430                                          | 0.037      | 0.426                                          | 0.052      |                             |            |                             |            | 0.241                                          | 0.037      | 0.236                                          | 0.052      |
| Tetra1c-4                               | 0.377                       | 0.027      | 0.376                       | 0.027      | 0.294                                          | 0.033      | 0.264                                          | 0.050      |                             |            |                             |            | 0.105                                          | 0.033      | 0.074                                          | 0.050      |
| Tetra1c-5                               | 0.187                       | 0.024      | 0.187                       | 0.024      | 0.268                                          | 0.030      | 0.266                                          | 0.038      |                             |            |                             |            | 0.079                                          | 0.030      | 0.076                                          | 0.038      |
| Tetra1c-6                               | 0.300                       | 0.026      | 0.299                       | 0.026      | 0.324                                          | 0.031      | 0.324                                          | 0.048      |                             |            |                             |            | 0.135                                          | 0.031      | 0.134                                          | 0.048      |
| Tetra1c-7                               | 0.356                       | 0.024      | 0.356                       | 0.024      | 0.295                                          | 0.031      | 0.275                                          | 0.041      |                             |            |                             |            | 0.106                                          | 0.031      | 0.085                                          | 0.041      |
| <b>Dyscrasite solution MC-ICP-MS:</b>   |                             |            |                             |            |                                                |            |                                                |            |                             |            |                             |            |                                                |            |                                                |            |
| Py572-1a-untreated-1                    |                             |            |                             |            |                                                |            |                                                |            | -0.125                      | 0.017      | -0.125                      | 0.017      | -0.107                                         | 0.032      | -0.127                                         | 0.024      |
| Py572-1a-untreated-2                    |                             |            |                             |            |                                                |            |                                                |            | -0.069                      | 0.016      | -0.069                      | 0.016      | -0.088                                         | 0.035      | -0.147                                         | 0.026      |
| Py572-1b-untreated-1                    |                             |            |                             |            |                                                |            |                                                |            | -0.121                      | 0.018      | -0.121                      | 0.018      | -0.127                                         | 0.033      | -0.175                                         | 0.023      |
| Py572-1b-untreated-2                    |                             |            |                             |            |                                                |            |                                                |            | -0.118                      | 0.017      | -0.116                      | 0.018      | -0.135                                         | 0.039      | -0.170                                         | 0.026      |
| Py572-1b-purified-1                     |                             |            |                             |            |                                                |            |                                                |            | -0.016                      | 0.026      | -0.012                      | 0.027      | -0.128                                         | 0.030      | -0.130                                         | 0.018      |
| Py572-1b-purified-2                     |                             |            |                             |            |                                                |            |                                                |            | -0.069                      | 0.019      | -0.069                      | 0.019      | -0.137                                         | 0.035      | -0.129                                         | 0.019      |
| Py572-1b-purified-3                     |                             |            |                             |            |                                                |            |                                                |            | -0.091                      | 0.016      | -0.091                      | 0.016      | -0.147                                         | 0.032      | -0.145                                         | 0.022      |
| <b>Dyscrasite LA MC-ICP-MS:</b>         |                             |            |                             |            |                                                |            |                                                |            |                             |            |                             |            |                                                |            |                                                |            |
| Py572-1c-1                              | 0.062                       | 0.026      | 0.061                       | 0.026      | 0.107                                          | 0.036      | 0.112                                          | 0.029      |                             |            |                             |            | -0.082                                         | 0.036      | -0.078                                         | 0.029      |
| Py572-1c-2                              | 0.078                       | 0.026      | 0.075                       | 0.026      | 0.129                                          | 0.036      | 0.123                                          | 0.030      |                             |            |                             |            | -0.060                                         | 0.036      | -0.067                                         | 0.030      |
| Py572-1c-3                              | 0.099                       | 0.030      | 0.098                       | 0.030      | 0.059                                          | 0.056      | 0.084                                          | 0.038      |                             |            |                             |            | -0.130                                         | 0.056      | -0.106                                         | 0.038      |
| Py572-1c-4                              | 0.129                       | 0.025      | 0.128                       | 0.025      | 0.111                                          | 0.053      | 0.125                                          | 0.035      |                             |            |                             |            | -0.078                                         | 0.053      | -0.065                                         | 0.035      |
| Py572-1c-5                              | 0.091                       | 0.028      | 0.090                       | 0.028      | 0.067                                          | 0.055      | 0.092                                          | 0.038      |                             |            |                             |            | -0.122                                         | 0.055      | -0.098                                         | 0.038      |
| Py572-1c-6                              | 0.114                       | 0.031      | 0.113                       | 0.031      | 0.098                                          | 0.060      | 0.111                                          | 0.040      |                             |            |                             |            | -0.091                                         | 0.060      | -0.079                                         | 0.040      |
| Py572-1c-7                              | 0.083                       | 0.033      | 0.081                       | 0.033      | 0.088                                          | 0.062      | 0.087                                          | 0.040      |                             |            |                             |            | -0.101                                         | 0.062      | -0.103                                         | 0.040      |
| Py572-1c-8                              | 0.091                       | 0.033      | 0.089                       | 0.033      | 0.102                                          | 0.061      | 0.133                                          | 0.039      |                             |            |                             |            | -0.087                                         | 0.061      | -0.057                                         | 0.039      |
| <b>Pyrrargyrite solution MC-ICP-MS:</b> |                             |            |                             |            |                                                |            |                                                |            |                             |            |                             |            |                                                |            |                                                |            |
| Py573-1a-untreated-1                    |                             |            |                             |            |                                                |            |                                                |            | -0.214                      | 0.015      | -0.214                      | 0.015      | -0.201                                         | 0.025      | -0.182                                         | 0.019      |
| Py573-1a-untreated-2                    |                             |            |                             |            |                                                |            |                                                |            | -0.192                      | 0.018      | -0.193                      | 0.018      | -0.190                                         | 0.025      | -0.191                                         | 0.018      |
| Py573-1a-untreated-3                    |                             |            |                             |            |                                                |            |                                                |            | -0.240                      | 0.018      | -0.240                      | 0.018      | -0.201                                         | 0.023      | -0.209                                         | 0.017      |
| Py573-1a-purified-1                     |                             |            |                             |            |                                                |            |                                                |            | -0.223                      | 0.025      | -0.225                      | 0.025      | -0.215                                         | 0.028      | -0.219                                         | 0.020      |
| Py573-1a-purified-2                     |                             |            |                             |            |                                                |            |                                                |            | -0.201                      | 0.019      | -0.199                      | 0.020      | -0.205                                         | 0.033      | -0.219                                         | 0.021      |
| Py573-1a-purified-3                     |                             |            |                             |            |                                                |            |                                                |            | -0.194                      | 0.017      | -0.194                      | 0.018      | -0.195                                         | 0.035      | -0.198                                         | 0.023      |

Table S3

|                                         | relative to SC              |            |                             |            |                                                |            |                                                |            | relative to NIST            |            |                             |            |                                                |            |                                                |            |
|-----------------------------------------|-----------------------------|------------|-----------------------------|------------|------------------------------------------------|------------|------------------------------------------------|------------|-----------------------------|------------|-----------------------------|------------|------------------------------------------------|------------|------------------------------------------------|------------|
|                                         | raw + blk corr              |            | MB-Te + blk                 |            | MB corr( <sup>119</sup> Sn/ <sup>117</sup> Sn) |            | MB corr( <sup>120</sup> Sn/ <sup>118</sup> Sn) |            | raw + blk corr              |            | MB-Te + blk                 |            | MB corr( <sup>119</sup> Sn/ <sup>117</sup> Sn) |            | MB corr( <sup>120</sup> Sn/ <sup>118</sup> Sn) |            |
|                                         | $\delta^{123}\text{Sb}$ [‰] | 2 $\sigma$ | $\delta^{123}\text{Sb}$ [‰] | 2 $\sigma$ | $\delta^{123}\text{Sb}$ [‰]                    | 2 $\sigma$ | $\delta^{123}\text{Sb}$ [‰]                    | 2 $\sigma$ | $\delta^{123}\text{Sb}$ [‰] | 2 $\sigma$ | $\delta^{123}\text{Sb}$ [‰] | 2 $\sigma$ | $\delta^{123}\text{Sb}$ [‰]                    | 2 $\sigma$ | $\delta^{123}\text{Sb}$ [‰]                    | 2 $\sigma$ |
| Py573-1b-untreated-1                    |                             |            |                             |            |                                                |            |                                                |            |                             |            |                             |            |                                                |            |                                                |            |
| Py573-1b-untreated-2                    |                             |            |                             |            |                                                |            |                                                |            |                             |            |                             |            |                                                |            |                                                |            |
| Py573-1b-purified-1                     |                             |            |                             |            |                                                |            |                                                |            |                             |            |                             |            |                                                |            |                                                |            |
| Py573-1b-purified-2                     |                             |            |                             |            |                                                |            |                                                |            |                             |            |                             |            |                                                |            |                                                |            |
| Py573-1b-purified-3                     |                             |            |                             |            |                                                |            |                                                |            |                             |            |                             |            |                                                |            |                                                |            |
| <b>Pyrrargyrite LA MC-ICP-MS:</b>       |                             |            |                             |            |                                                |            |                                                |            |                             |            |                             |            |                                                |            |                                                |            |
| Py573-1c-1(high energy)                 | 0.013                       | 0.026      | 0.009                       | 0.026      | 0.082                                          | 0.035      | 0.091                                          | 0.029      |                             |            |                             |            | -0.107                                         | 0.035      | -0.099                                         | 0.029      |
| Py573-1c-2(high energy)                 | -0.034                      | 0.024      | -0.035                      | 0.024      | 0.071                                          | 0.033      | 0.082                                          | 0.026      |                             |            |                             |            | -0.118                                         | 0.033      | -0.108                                         | 0.026      |
| Py573-1c-3(high energy)                 | 0.121                       | 0.027      | 0.116                       | 0.027      | 0.102                                          | 0.035      | 0.096                                          | 0.029      |                             |            |                             |            | -0.087                                         | 0.035      | -0.094                                         | 0.029      |
| Py573-1c-4(high energy)                 | 0.081                       | 0.025      | 0.078                       | 0.024      | 0.097                                          | 0.034      | 0.080                                          | 0.028      |                             |            |                             |            | -0.092                                         | 0.034      | -0.11                                          | 0.028      |
| Py573-1c-5(low energy)                  | 0.071                       | 0.027      | 0.070                       | 0.027      | 0.048                                          | 0.053      | 0.075                                          | 0.035      |                             |            |                             |            | -0.141                                         | 0.053      | -0.115                                         | 0.035      |
| Py573-1c-6(low energy)                  | 0.062                       | 0.028      | 0.061                       | 0.028      | 0.042                                          | 0.052      | 0.074                                          | 0.037      |                             |            |                             |            | -0.147                                         | 0.052      | -0.116                                         | 0.037      |
| Py573-1c-7(low energy)                  | 0.047                       | 0.031      | 0.047                       | 0.031      | 0.056                                          | 0.051      | 0.052                                          | 0.035      |                             |            |                             |            | -0.133                                         | 0.051      | -0.138                                         | 0.035      |
| Py573-1c-8(low energy)                  | -0.046                      | 0.033      | -0.047                      | 0.033      | -0.036                                         | 0.053      | -0.036                                         | 0.037      |                             |            |                             |            | -0.225                                         | 0.053      | -0.226                                         | 0.037      |
| Py573-1c-9(low energy)                  | -0.081                      | 0.034      | -0.081                      | 0.034      | -0.046                                         | 0.054      | -0.034                                         | 0.038      |                             |            |                             |            | -0.235                                         | 0.054      | -0.224                                         | 0.038      |
| <b>Pyrrargyrite solution MC-ICP-MS:</b> |                             |            |                             |            |                                                |            |                                                |            |                             |            |                             |            |                                                |            |                                                |            |
| Py574-1a-untreated-1                    |                             |            |                             |            |                                                |            |                                                |            |                             |            |                             |            | -0.464                                         | 0.019      | -0.465                                         | 0.019      |
| Py574-1a-untreated-2                    |                             |            |                             |            |                                                |            |                                                |            |                             |            |                             |            | -0.526                                         | 0.017      | -0.526                                         | 0.017      |
| Py574-1b-untreated-1                    |                             |            |                             |            |                                                |            |                                                |            |                             |            |                             |            | -0.541                                         | 0.016      | -0.540                                         | 0.016      |
| Py574-1b-untreated-2                    |                             |            |                             |            |                                                |            |                                                |            |                             |            |                             |            | -0.547                                         | 0.018      | -0.548                                         | 0.018      |
| Py574-1a-purified-1                     |                             |            |                             |            |                                                |            |                                                |            |                             |            |                             |            | -0.447                                         | 0.015      | -0.446                                         | 0.015      |
| Py574-1a-purified-2                     |                             |            |                             |            |                                                |            |                                                |            |                             |            |                             |            | -0.480                                         | 0.022      | -0.480                                         | 0.022      |
| Py574-1a-purified-3                     |                             |            |                             |            |                                                |            |                                                |            |                             |            |                             |            | -0.415                                         | 0.018      | -0.415                                         | 0.018      |
| Py574-1b-purified-1                     |                             |            |                             |            |                                                |            |                                                |            |                             |            |                             |            | -0.469                                         | 0.026      | -0.469                                         | 0.027      |
| Py574-1b-purified-2                     |                             |            |                             |            |                                                |            |                                                |            |                             |            |                             |            | -0.456                                         | 0.020      | -0.458                                         | 0.021      |
| Py574-1b-purified-3                     |                             |            |                             |            |                                                |            |                                                |            |                             |            |                             |            | -0.480                                         | 0.017      | -0.480                                         | 0.017      |
| <b>Pyrrargyrite LA MC-ICP-MS:</b>       |                             |            |                             |            |                                                |            |                                                |            |                             |            |                             |            |                                                |            |                                                |            |
| Py574-1c-1 (high energy)                | -0.134                      | 0.027      | -0.137                      | 0.027      | -0.192                                         | 0.035      | -0.177                                         | 0.027      |                             |            |                             |            | -0.381                                         | 0.035      | -0.367                                         | 0.027      |
| Py574-1c-2 (high energy)                | -0.282                      | 0.026      | -0.285                      | 0.026      | -0.302                                         | 0.034      | -0.299                                         | 0.026      |                             |            |                             |            | -0.491                                         | 0.034      | -0.489                                         | 0.026      |
| Py574-1c-3 (high energy)                | -0.266                      | 0.026      | -0.268                      | 0.026      | -0.262                                         | 0.034      | -0.257                                         | 0.027      |                             |            |                             |            | -0.451                                         | 0.034      | -0.447                                         | 0.027      |
| Py574-1c-5 (low energy)                 | -0.414                      | 0.039      | -0.415                      | 0.039      | -0.369                                         | 0.058      | -0.365                                         | 0.045      |                             |            |                             |            | -0.558                                         | 0.058      | -0.555                                         | 0.045      |
| Py574-1c-6 (low energy)                 | -0.339                      | 0.036      | -0.339                      | 0.036      | -0.313                                         | 0.058      | -0.311                                         | 0.044      |                             |            |                             |            | -0.502                                         | 0.058      | -0.501                                         | 0.044      |
| Py574-1c-7 (low energy)                 | -0.286                      | 0.036      | -0.286                      | 0.036      | -0.311                                         | 0.057      | -0.315                                         | 0.042      |                             |            |                             |            | -0.500                                         | 0.057      | -0.505                                         | 0.042      |
